# Supplementary material for: Genome-wide association study identifies multiple new loci associated with Ewing sarcoma susceptibility
Source: Springer Nature journal article supplement (doi:10.1038/s41467-018-05537-2), 2018-08-03

## **Supplementary Information**

### **Genome-wide association study identifies multiple new loci associated with Ewing sarcoma susceptibility**

Mitchell J. Machiela, Thomas G. P. Grünewald, Didier Surdez, Stephanie Reynaud, Olivier Mirabeau, Eric Karlins, Rebeca Alba Rubio, Sakina Zaidi, Sandrine Grossetete-Lalami, Stelly Ballet, Eve Lapouble, Valérie Laurence, Jean Michon, Gaelle Pierron, Heinrich Kovar, Nathalie Gaspar, Udo Konzny, Anna González-Neira, Piero Picci, Javier Alonso, Ana Patino-Garcia, Nadège Corradini, Perrine Marec Bérard, Neal D. Freedman, Nathaniel Rothman, Casey L. Dagnall, Laurie Burdett, Kristine Jones, Michelle Manning, Kathleen Wyatt, Weiyin Zhou, Meredith Yeager, David G. Cox, Robert N. Hoover, Javed Khan, Gregory T. Armstrong, Wendy M. Leisenring, Smita Bhatia, Leslie L. Robison, Andreas E. Kulozik, Jennifer Kriebel, Thomas Meitinger, Markus Metzler, Wolfgang Hartmann, Konstantin Strauch, Thomas Kirchner, Uta Dirksen, Lindsay M. Morton, Lisa Mirabello, Margaret A. Tucker, Franck Tirode, Stephen J. Chanock and Olivier Delattre

## Supplementary Tables

**Supplementary Table 1. Study specific associations at each EWS susceptibility locus.**

|                                                      |                      | SNP RSID           | A1       | A2       | Beta            | Std Error      | Odds Ratio     | 95% Confidence Interval | P-value         | Q           | I <sup>2</sup> |
|------------------------------------------------------|----------------------|--------------------|----------|----------|-----------------|----------------|----------------|-------------------------|-----------------|-------------|----------------|
| <b>1p36.22 (rs113663169, lead SNP)</b>               |                      |                    |          |          |                 |                |                |                         |                 |             |                |
|                                                      | Published            | rs113663169        | T        | C        | -0.80661        | 0.12591        | 0.44637        | 0.34875 0.57130         | 1.49E-10        |             |                |
|                                                      | CCSS                 | rs113663169        | T        | C        | -0.62387        | 0.18847        | 0.53587        | 0.37037 0.77532         | 0.00093         |             |                |
|                                                      | Curie/NCI            | rs113663169        | T        | C        | -0.60890        | 0.18672        | 0.54395        | 0.37724 0.78432         | 0.0011021       |             |                |
|                                                      | <b>GWAS Meta</b>     | <b>rs113663169</b> | <b>T</b> | <b>C</b> | <b>-0.71642</b> | <b>0.09128</b> | <b>0.48850</b> | <b>0.40847 0.58420</b>  | <b>4.32E-15</b> | <b>0.58</b> | <b>0.00</b>    |
| <b>1p36.22 (rs9430161, previously published SNP)</b> |                      |                    |          |          |                 |                |                |                         |                 |             |                |
|                                                      | Published            | rs9430161          | G        | T        | -0.78671        | 0.12450        | 0.45534        | 0.35675 0.58118         | 2.63E-10        |             |                |
|                                                      | CCSS                 | rs9430161          | G        | T        | -0.63185        | 0.18660        | 0.53161        | 0.36877 0.76635         | 0.00071         |             |                |
|                                                      | Curie/NCI            | rs9430161          | G        | T        | -0.59957        | 0.18675        | 0.54905        | 0.38075 0.79173         | 1.33E-03        |             |                |
|                                                      | <b>GWAS Meta</b>     | <b>rs9430161</b>   | <b>G</b> | <b>T</b> | <b>-0.70623</b> | <b>0.09055</b> | <b>0.49350</b> | <b>0.41325 0.58934</b>  | <b>6.32E-15</b> | <b>0.64</b> | <b>0.00</b>    |
| <b>6p25.1 (rs7742053, lead SNP)</b>                  |                      |                    |          |          |                 |                |                |                         |                 |             |                |
|                                                      | Published            | rs7742053          | C        | A        | 0.70623         | 0.13742        | 2.02635        | 1.54790 2.65268         | 2.76E-07        |             |                |
|                                                      | CCSS                 | rs7742053          | C        | A        | 0.68448         | 0.19774        | 1.98275        | 1.34571 2.92135         | 0.000537        |             |                |
|                                                      | Curie/NCI            | rs7742053          | C        | A        | 0.22035         | 0.20366        | 1.24652        | 0.83625 1.85805         | 0.279268        |             |                |
|                                                      | <b>GWAS Meta</b>     | <b>rs7742053</b>   | <b>C</b> | <b>A</b> | <b>0.58667</b>  | <b>0.09870</b> | <b>1.79800</b> | <b>1.48175 2.18175</b>  | <b>2.78E-09</b> | <b>0.12</b> | <b>52.80</b>   |
| <b>6p25.1 (rs7744366, TaqMan SNP)</b>                |                      |                    |          |          |                 |                |                |                         |                 |             |                |
|                                                      | Published            | rs7744366          | G        | A        | 0.62826         | 0.12556        | 1.87434        | 1.46546 2.39731         | 5.62E-07        |             |                |
|                                                      | CCSS                 | rs7744366          | G        | A        | 0.69019         | 0.19444        | 1.99409        | 1.36217 2.91917         | 0.000386        |             |                |
|                                                      | Curie/NCI            | rs7744366          | G        | A        | 0.17018         | 0.18998        | 1.18552        | 0.81696 1.72036         | 0.370353        |             |                |
|                                                      | German               | rs7744366          | G        | A        | 0.40922         | 0.13633        | 1.50564        | 1.15259 1.96683         | 0.002685        |             |                |
|                                                      | European             | rs7744366          | G        | A        | 0.67937         | 0.11106        | 1.97263        | 1.58676 2.45233         | 1.00E-09        |             |                |
|                                                      | <b>GWAS Meta</b>     | <b>rs7744366</b>   | <b>G</b> | <b>A</b> | <b>0.53427</b>  | <b>0.09222</b> | <b>1.70620</b> | <b>1.42407 2.04422</b>  | <b>6.90E-09</b> | <b>0.09</b> | <b>58.99</b>   |
|                                                      | <b>GWAS Meta+Rep</b> | <b>rs7744366</b>   | <b>G</b> | <b>A</b> | <b>0.55421</b>  | <b>0.06294</b> | <b>1.74056</b> | <b>1.53857 1.96907</b>  | <b>1.30E-18</b> | <b>0.12</b> | <b>45.39</b>   |
| <b>8q24.23 (rs7832583, lead + TaqMan SNP)</b>        |                      |                    |          |          |                 |                |                |                         |                 |             |                |
|                                                      | Published            | rs7832583          | T        | C        | 0.57639         | 0.18324        | 1.77960        | 1.24263 2.54860         | 0.00166         |             |                |
|                                                      | CCSS                 | rs7832583          | T        | C        | 0.76874         | 0.25124        | 2.15704        | 1.31826 3.52952         | 0.00221         |             |                |
|                                                      | Curie/NCI            | rs7832583          | T        | C        | 0.75371         | 0.26367        | 2.12486        | 1.26733 3.56264         | 0.00426         |             |                |
|                                                      | German               | rs7832583          | T        | C        | 0.06842         | 0.20420        | 1.07081        | 0.71763 1.59782         | 0.73759         |             |                |
|                                                      | European             | rs7832583          | T        | C        | 0.37411         | 0.13818        | 1.45369        | 1.10879 1.90588         | 0.00678         |             |                |
|                                                      | <b>GWAS Meta</b>     | <b>rs7832583</b>   | <b>T</b> | <b>C</b> | <b>0.66967</b>  | <b>0.12909</b> | <b>1.95360</b> | <b>1.51689 2.51604</b>  | <b>2.13E-07</b> | <b>0.77</b> | <b>0.00</b>    |
|                                                      | <b>GWAS Meta+Rep</b> | <b>rs7832583</b>   | <b>T</b> | <b>C</b> | <b>0.45041</b>  | <b>0.08563</b> | <b>1.56896</b> | <b>1.32654 1.85569</b>  | <b>1.44E-07</b> | <b>0.13</b> | <b>44.49</b>   |
| <b>10q21.3 (rs10822056, lead SNP)</b>                |                      |                    |          |          |                 |                |                |                         |                 |             |                |
|                                                      | Published            | rs10822056         | C        | T        | 0.63857         | 0.09451        | 1.89377        | 1.57353 2.27919         | 1.42E-11        |             |                |
|                                                      | CCSS                 | rs10822056         | C        | T        | 0.54080         | 0.13837        | 1.71738        | 1.30943 2.25241         | 9.29E-05        |             |                |
|                                                      | Curie/NCI            | rs10822056         | C        | T        | 0.42118         | 0.14553        | 1.52376        | 1.14561 2.02673         | 0.00380         |             |                |
|                                                      | <b>GWAS Meta</b>     | <b>rs10822056</b>  | <b>C</b> | <b>T</b> | <b>0.56588</b>  | <b>0.06893</b> | <b>1.76100</b> | <b>1.53846 2.01573</b>  | <b>1.92E-16</b> | <b>0.45</b> | <b>0.00</b>    |
| <b>10q21.3 (rs224278, previously published SNP)</b>  |                      |                    |          |          |                 |                |                |                         |                 |             |                |
|                                                      | Published            | rs224278           | C        | T        | -0.55442        | 0.09357        | 0.57440        | 0.47816 0.69002         | 3.12E-09        |             |                |
|                                                      | CCSS                 | rs224278           | C        | T        | -0.58124        | 0.14136        | 0.55920        | 0.42388 0.73772         | 3.92E-05        |             |                |
|                                                      | Curie/NCI            | rs224278           | C        | T        | -0.44686        | 0.14799        | 0.63963        | 0.47858 0.85488         | 2.53E-03        |             |                |
|                                                      | <b>GWAS Meta</b>     | <b>rs224278</b>    | <b>C</b> | <b>T</b> | <b>-0.53734</b> | <b>0.06901</b> | <b>0.58430</b> | <b>0.51038 0.66892</b>  | <b>6.88E-15</b> | <b>0.78</b> | <b>0.00</b>    |
| <b>15q15.1 (rs2412476, lead SNP)</b>                 |                      |                    |          |          |                 |                |                |                         |                 |             |                |
|                                                      | Published            | rs2412476          | T        | C        | -0.57458        | 0.10742        | 0.56294        | 0.45606 0.69487         | 8.86E-08        |             |                |
|                                                      | CCSS                 | rs2412476          | T        | C        | -0.52591        | 0.15598        | 0.59102        | 0.43534 0.80237         | 0.000747        |             |                |
|                                                      | Curie/NCI            | rs2412476          | T        | C        | -0.50644        | 0.15792        | 0.60264        | 0.44221 0.82127         | 0.001342        |             |                |
|                                                      | <b>GWAS Meta</b>     | <b>rs2412476</b>   | <b>T</b> | <b>C</b> | <b>-0.54645</b> | <b>0.07719</b> | <b>0.57900</b> | <b>0.49770 0.67358</b>  | <b>1.45E-12</b> | <b>0.93</b> | <b>0.00</b>    |
| <b>15q15.1 (rs4924410, previously published SNP)</b> |                      |                    |          |          |                 |                |                |                         |                 |             |                |
|                                                      | Published            | rs4924410          | A        | C        | -0.46293        | 0.09711        | 0.62944        | 0.52034 0.76141         | 1.87E-06        |             |                |
|                                                      | CCSS                 | rs4924410          | A        | C        | -0.47904        | 0.14449        | 0.61938        | 0.46662 0.82214         | 9.15E-04        |             |                |
|                                                      | Curie/NCI            | rs4924410          | A        | C        | -0.53611        | 0.14322        | 0.58502        | 0.44184 0.77461         | 1.82E-04        |             |                |
|                                                      | <b>GWAS Meta</b>     | <b>rs4924410</b>   | <b>A</b> | <b>C</b> | <b>-0.48435</b> | <b>0.07024</b> | <b>0.61610</b> | <b>0.53686 0.70704</b>  | <b>5.37E-12</b> | <b>0.91</b> | <b>0.00</b>    |
| <b>20p11.22 (rs6047482, lead SNP)</b>                |                      |                    |          |          |                 |                |                |                         |                 |             |                |
|                                                      | Published            | rs6047482          | A        | T        | -0.57897        | 0.10976        | 0.56047        | 0.45199 0.69500         | 1.33E-07        |             |                |
|                                                      | CCSS                 | rs6047482          | A        | T        | -0.57231        | 0.16410        | 0.56422        | 0.40904 0.77828         | 0.00049         |             |                |
|                                                      | Curie/NCI            | rs6047482          | A        | T        | -0.49197        | 0.16194        | 0.61142        | 0.44514 0.83982         | 0.00238         |             |                |
|                                                      | <b>GWAS Meta</b>     | <b>rs6047482</b>   | <b>A</b> | <b>T</b> | <b>-0.55652</b> | <b>0.07950</b> | <b>0.57320</b> | <b>0.49050 0.66984</b>  | <b>2.55E-12</b> | <b>0.90</b> | <b>0.00</b>    |
| <b>20p11.22 (rs12106193, TaqMan SNP)</b>             |                      |                    |          |          |                 |                |                |                         |                 |             |                |
|                                                      | Published            | rs12106193         | G        | C        | -0.47853        | 0.12488        | 0.61970        | 0.48516 0.79155         | 1.27E-04        |             |                |
|                                                      | CCSS                 | rs12106193         | G        | C        | -0.73404        | 0.18021        | 0.47997        | 0.33714 0.68329         | 0.00005         |             |                |
|                                                      | Curie/NCI            | rs12106193         | G        | C        | -0.60543        | 0.18299        | 0.54584        | 0.38133 0.78133         | 0.00094         |             |                |
|                                                      | German               | rs12106193         | G        | C        | -0.69129        | 0.16708        | 0.50093        | 0.36104 0.69502         | 3.51E-05        |             |                |
|                                                      | European             | rs12106193         | G        | C        | -0.43490        | 0.14040        | 0.64733        | 0.49160 0.85239         | 0.00196         |             |                |
|                                                      | <b>GWAS Meta</b>     | <b>rs12106193</b>  | <b>G</b> | <b>C</b> | <b>-0.57199</b> | <b>0.08953</b> | <b>0.56440</b> | <b>0.47357 0.67265</b>  | <b>1.67E-10</b> | <b>0.50</b> | <b>0.00</b>    |
|                                                      | <b>GWAS Meta+Rep</b> | <b>rs12106193</b>  | <b>G</b> | <b>C</b> | <b>-0.55928</b> | <b>0.06879</b> | <b>0.57162</b> | <b>0.49952 0.65412</b>  | <b>4.28E-16</b> | <b>0.59</b> | <b>0.00</b>    |
| <b>20p11.23 (rs6106336, lead + TaqMan SNP)</b>       |                      |                    |          |          |                 |                |                |                         |                 |             |                |
|                                                      | Published            | rs6106336          | T        | G        | 0.44871         | 0.13074        | 1.56628        | 1.21223 2.02374         | 0.00060         |             |                |
|                                                      | CCSS                 | rs6106336          | T        | G        | 0.94104         | 0.22552        | 2.56265        | 1.64711 3.98708         | 3.01E-05        |             |                |
|                                                      | Curie/NCI            | rs6106336          | T        | G        | 0.49771         | 0.20893        | 1.64495        | 1.09221 2.47742         | 0.01721         |             |                |
|                                                      | German               | rs6106336          | T        | G        | 0.31438         | 0.14959        | 1.36942        | 1.02142 1.83597         | 0.03558         |             |                |
|                                                      | European             | rs6106336          | T        | G        | 0.18995         | 0.11849        | 1.20918        | 0.95859 1.52529         | 0.10892         |             |                |
|                                                      | <b>GWAS Meta</b>     | <b>rs6106336</b>   | <b>T</b> | <b>G</b> | <b>0.55561</b>  | <b>0.09947</b> | <b>1.74300</b> | <b>1.43426 2.11820</b>  | <b>2.33E-08</b> | <b>0.16</b> | <b>45.45</b>   |
|                                                      | <b>GWAS Meta+Rep</b> | <b>rs6106336</b>   | <b>T</b> | <b>G</b> | <b>0.38629</b>  | <b>0.06846</b> | <b>1.47151</b> | <b>1.28674 1.68282</b>  | <b>1.68E-08</b> | <b>0.05</b> | <b>58.10</b>   |

**Supplementary Table 2.** Concordance tables comparing TaqMan genotypes to array imputed genotypes. The correlation\_c is the correlation between continuous imputed dosages and the TaqMan genotypes and the correlation\_d is the correlation between imputed hard genotype calls (e.g. 0, 1, or 2) and TaqMan genotypes.

**rs7744366**

|                 |    | Imputed Genotype |    |   |     |
|-----------------|----|------------------|----|---|-----|
|                 |    | 0                | 1  | 2 |     |
| TaqMan Genotype | 0  | 241              | 7  | 0 | 248 |
|                 | 1  | 1                | 75 | 0 | 76  |
|                 | 2  | 0                | 0  | 7 | 7   |
|                 | NA | 2                | 4  | 0 | 6   |
|                 |    | 244              | 86 | 7 | 337 |

concordance: 95.8%  
correlation\_c: 94.8%  
correlation\_d: 95.1%

**rs7832583**

|                 |    | Imputed Genotype |    |   |     |
|-----------------|----|------------------|----|---|-----|
|                 |    | 0                | 1  | 2 |     |
| TaqMan Genotype | 0  | 294              | 0  | 0 | 294 |
|                 | 1  | 0                | 40 | 0 | 40  |
|                 | 2  | 0                | 0  | 0 | 0   |
|                 | NA | 2                | 0  | 1 | 3   |
|                 |    | 296              | 40 | 1 | 337 |

concordance: 99.1%  
correlation\_c: 100%  
correlation\_d: 100%

**rs12106193**

|                 |    | Imputed Genotype |     |    |     |
|-----------------|----|------------------|-----|----|-----|
|                 |    | 0                | 1   | 2  |     |
| TaqMan Genotype | 0  | 213              | 8   | 0  | 221 |
|                 | 1  | 5                | 90  | 3  | 98  |
|                 | 2  | 0                | 4   | 12 | 16  |
|                 | NA | 0                | 2   | 0  | 2   |
|                 |    | 218              | 104 | 15 | 337 |

concordance: 93.5%  
correlation\_c: 94.0%  
correlation\_d: 91.0%

**rs6106336**

|                 |    | Imputed Genotype |    |   |     |
|-----------------|----|------------------|----|---|-----|
|                 |    | 0                | 1  | 2 |     |
| TaqMan Genotype | 0  | 264              | 0  | 0 | 264 |
|                 | 1  | 2                | 63 | 0 | 65  |
|                 | 2  | 0                | 1  | 2 | 3   |
|                 | NA | 3                | 0  | 2 | 5   |
|                 |    | 269              | 64 | 4 | 337 |

concordance: 97.6%  
correlation\_c: 97.8%  
correlation\_d: 97.6%

**Supplementary Table 3.** Allele frequencies of EWS risk allele across 1000 Genomes Project African (AFR), Eastern Asian (EAS) and European (EUR) populations.

| Region   | Top SNP     | Alleles |      | Population Risk Allele Frequency |       |       |
|----------|-------------|---------|------|----------------------------------|-------|-------|
|          |             | Ref     | Risk | AFR                              | EAS   | EUR   |
| 1p36.22  | rs113663169 | C       | T    | 0.469                            | 0.921 | 0.805 |
| 6p25.1   | rs7742053   | C       | A    | 0.274                            | 0.158 | 0.120 |
| 8q24.23  | rs7832583   | T       | C    | 0.323                            | 0.150 | 0.071 |
| 10q21.3  | rs10822056  | C       | T    | 0.611                            | 0.387 | 0.495 |
| 15q15.1  | rs2412476   | C       | T    | 0.478                            | 0.290 | 0.708 |
| 20p11.22 | rs6047482   | T       | A    | 0.256                            | 0.676 | 0.731 |
| 20p11.23 | rs6106336   | T       | G    | 0.161                            | 0.320 | 0.145 |

**Supplementary Table 4.** Distance of top SNP in EWS susceptibility regions to the nearest EWSR1-FLI1 binding site in A673 and TC71 cell lines. These variants were significantly closer to EWSR1-FLI1 binding sites than 1,000 randomly selected SNPs on chromosomes 1, 6, 10, 15, and 20 in the A673 and TC71 cell lines (Wilcoxon P-values=0.0025 and 0.0009, respectively).

| Locus   | Top SNP     | Distance of the closest EWSR1-FLI1 peak |        |
|---------|-------------|-----------------------------------------|--------|
|         |             | A673                                    | TC71   |
| 1       | 1:11046565  | 1,031                                   | 806    |
| 6       | 6:6841452   | 3,616                                   | 3,913  |
| 10      | 10:64514111 | 24,943                                  | 56,760 |
| 15      | 15:40335852 | 1,361                                   | 3,008  |
| 20_cond | 20:21055045 | 28,225                                  | 15,488 |
| 20      | 20:21539683 | 2,469                                   | 3,000  |

**Supplementary Table 5.** Reported dbSNP germline genetic variants in or around GGAA microsatellites in EWS susceptibility regions.

| dbSNP_ID               | strand | ALT<br>(CEU) | ALT<br>(AFR) | ALT  | REF      | Type  | Consequence           |
|------------------------|--------|--------------|--------------|------|----------|-------|-----------------------|
| <i>6p25.1 Region</i>   |        |              |              |      |          |       |                       |
| rs10541084             | +      | 0.427        | 0.373        | GAAG | -        | indel | ALT enlarges the mSat |
| rs747450015            | +      | very rare    | very rare    | -    | GAAGGAAG | indel | REF enlarges the mSat |
| rs773578278            | +      | very rare    | very rare    | -    | GAAG     | indel | REF enlarges the mSat |
| rs201655383            | +      | very rare    | very rare    | A    | G        | SNP   | REF enlarges the mSat |
| rs1290423              | -      | very rare    | very rare    | T    | C        | SNP   | REF enlarges the mSat |
| rs183899156            | +      | very rare    | very rare    | G    | A        | SNP   | ALT enlarges the mSat |
| rs1290422              | -      | very rare    | very rare    | C    | T        | SNP   | ALT enlarges the mSat |
| rs186451795            | +      | very rare    | very rare    | A    | G        | SNP   | REF enlarges the mSat |
| <i>20p11.22 Region</i> |        |              |              |      |          |       |                       |
| rs140435773            | +      | 0.1223       | 0.3933       | C    | -        | indel | REF enlarges the mSat |
| rs6035896              | +      | 0.0129       | 0.0166       | C    | T        | SNP   | REF enlarges the mSat |
| rs74187972             | +      | very rare    | very rare    | C    | -        | indel | REF enlarges the mSat |
| rs536579051            | +      | very rare    | very rare    | -    | CTT      | indel | REF enlarges the mSat |
| rs57407269             | +      | very rare    | very rare    | -    | TTC      | indel | REF enlarges the mSat |
| rs199961320            | +      | very rare    | very rare    | -    | TCC      | indel | REF enlarges the mSat |
| rs955238766            | +      | very rare    | very rare    | G    | C        | SNP   | REF enlarges the mSat |
| rs868358636            | +      | very rare    | very rare    | C    | T        | SNP   | REF enlarges the mSat |
| rs796575942            | +      | very rare    | very rare    | T    | C        | SNP   | REF enlarges the mSat |
| rs57875684             | +      | very rare    | very rare    | -    | C        | indel | REF enlarges the mSat |
| rs140662159            | +      | very rare    | very rare    | TCTT | -        | indel | REF enlarges the mSat |
| rs4815052              | +      | 0.9583       | 1.0000       | T    | C        | SNP   | REF enlarges the mSat |
| rs200957039            | +      | 0.9245       | 0.9939       | TTCT | -        | indel | ALT enlarges the mSat |
| rs61629094             | +      | very rare    | very rare    | -    | CCTTCCT  | indel | REF enlarges the mSat |

**Supplementary Table 6.** Reported eQTLs in GTEx tissues that are in linkage disequilibrium with the 20p11.22 (rs6047482) and 20p11.23 (rs6106336) GWAS lead variants. The cutoff for linkage disequilibrium was an  $R^2 < 0.5$  in the CEU population. Only significant eQTLs (P-value < 0.05) for the most associated GTEx tissue-specific variants in linkage disequilibrium with the lead variant are reported.

| GTEx Tissue                     | EWS GWAS Region | Most Associated Variant ( $R^2$ CEU) | eQTL Association P-value by Gene |                  |               |             |             |             |
|---------------------------------|-----------------|--------------------------------------|----------------------------------|------------------|---------------|-------------|-------------|-------------|
|                                 |                 |                                      | <i>INSM1</i>                     | <i>LINC00261</i> | <i>NKX2-2</i> | <i>PAX1</i> | <i>KIZ*</i> | <i>XRN2</i> |
| Artery - Tibial                 | 20p11.22        |                                      | n.s.                             | n.s.             | n.s.          | n.s.        | n.s.        | n.s.        |
|                                 | 20p11.23        | rs11087340 (1.00)                    | n.s.                             | n.s.             | n.s.          | n.s.        | 8.0E-05     | n.s.        |
| Cells - Transformed fibroblasts | 20p11.22        | rs112337001 (0.51)                   | n.s.                             | n.s.             | n.s.          | n.s.        | n.s.        | 7.3E-06     |
|                                 | 20p11.23        |                                      | n.s.                             | n.s.             | n.s.          | n.s.        | n.s.        | n.s.        |
| Skin - Sun Exposed (Lower leg)  | 20p11.22        | rs6035892 (0.54)                     | n.s.                             | n.s.             | n.s.          | n.s.        | 4.2E-07     | n.s.        |
|                                 | 20p11.23        | rs6047244 (0.72)                     | n.s.                             | n.s.             | n.s.          | n.s.        | 1.8E-08     | n.s.        |
| Testis                          | 20p11.22        | rs6035892 (0.54)                     | n.s.                             | n.s.             | n.s.          | n.s.        | 4.2E-06     | n.s.        |
|                                 | 20p11.23        | rs6137252 (1.00)                     | n.s.                             | n.s.             | n.s.          | n.s.        | 5.1E-10     | n.s.        |
| Whole Blood                     | 20p11.22        |                                      | n.s.                             | n.s.             | n.s.          | n.s.        | n.s.        | n.s.        |
|                                 | 20p11.23        | rs6137246 (0.96)                     | n.s.                             | n.s.             | n.s.          | n.s.        | 1.4E-11     | n.s.        |

\**KIZ* is denoted as the alias *PLK1S1* in GETx

n.s.=not significant

**Supplementary Table 7.** Commercially available TaqMan assays used in genotype validation and independent replication.

| RefSeq ID         | Oligo ID     | Poly ID      | Sequence                    | Direction |
|-------------------|--------------|--------------|-----------------------------|-----------|
| <b>rs7744366</b>  | Oligo-104717 | Poly-0156621 | TCAGGCACCAAATTCCTAAGCA      | F         |
|                   | Oligo-104718 | Poly-0156621 | ACTCTGATGGACCTGCAGGA        | R         |
|                   | Oligo-104719 | Poly-0156621 | CCCTTCCTACAGGACAG           |           |
|                   | Oligo-104720 | Poly-0156621 | CCCTTCCTACGGGACAG           |           |
| <b>rs7832583</b>  | Oligo-104705 | Poly-0156616 | GTGGTACTAGAAATTGACAATGTGCAT | F         |
|                   | Oligo-104708 | Poly-0156616 | CCTAGGGAACAGAGGGAGACT       | R         |
|                   | Oligo-104711 | Poly-0156616 | AATAAAGCTTAGGGATATAA        |           |
|                   | Oligo-104714 | Poly-0156616 | AGAAATAAAGCTTAGAGATATAA     |           |
| <b>rs12106193</b> | Oligo-106123 | Poly-0156651 | GTGCATCCCTGGTCCTTCT         | F         |
|                   | Oligo-106125 | Poly-0156651 | CACATGAGACCCAGTGAAACCAT     | R         |
|                   | Oligo-106127 | Poly-0156651 | TTGTGAAGCCTCTTTC            |           |
|                   | Oligo-106129 | Poly-0156651 | TTGTGAAGGCTCTTTC            |           |
| <b>rs6106336</b>  | Oligo-104707 | Poly-0156618 | GGGACAGTCAGAAGAAATTCAGAAGA  | F         |
|                   | Oligo-104710 | Poly-0156618 | AGCAAGAGATGCACCAGTAATGG     | R         |
|                   | Oligo-104713 | Poly-0156618 | CCTCTGGACTTTGAC             |           |
|                   | Oligo-104716 | Poly-0156618 | CCTCTGGAATTTGAC             |           |



## Supplementary Figures

**Supplementary Figure 1.** Quantile-quantile plot of expected  $-\log_{10}$  P-values to observed  $-\log_{10}$  P-values. Dashed line is where observed equals expected. A total of 6,876,682 variants were included in the meta-analysis with a resulting lambda statistic of 1.0354.

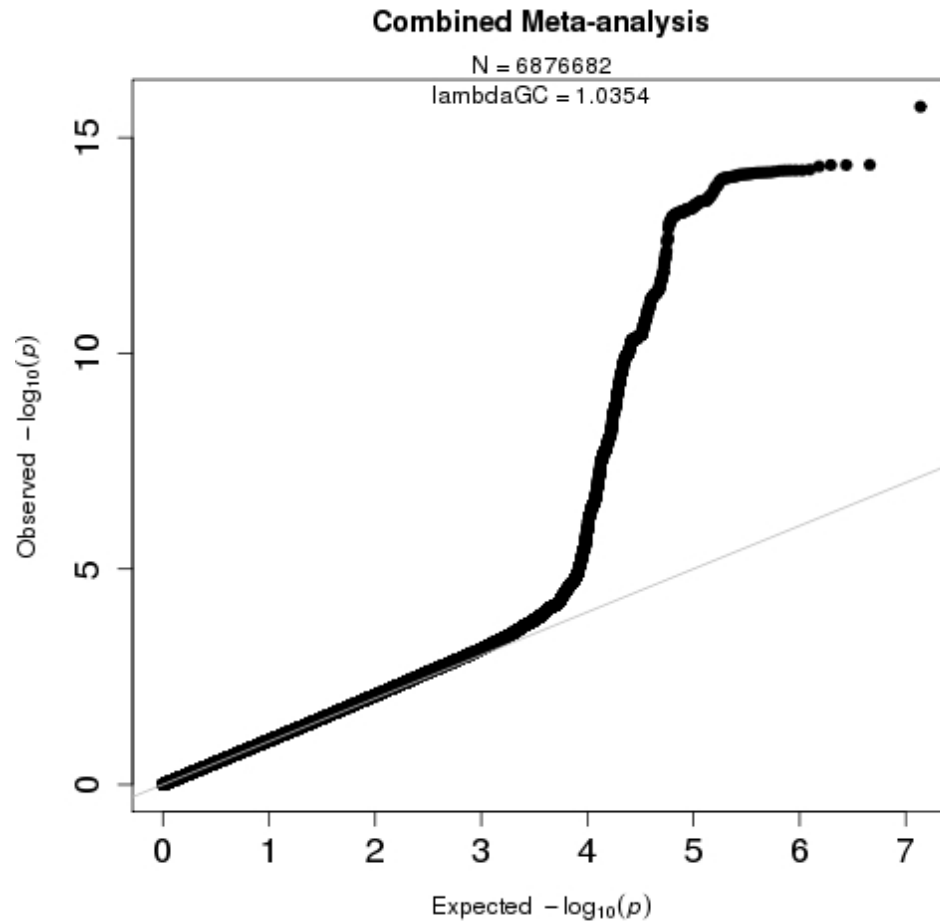

**Supplementary Figure 2A.** Meta-analysis forest plots for the 1p36.22 EWS susceptibility locus.

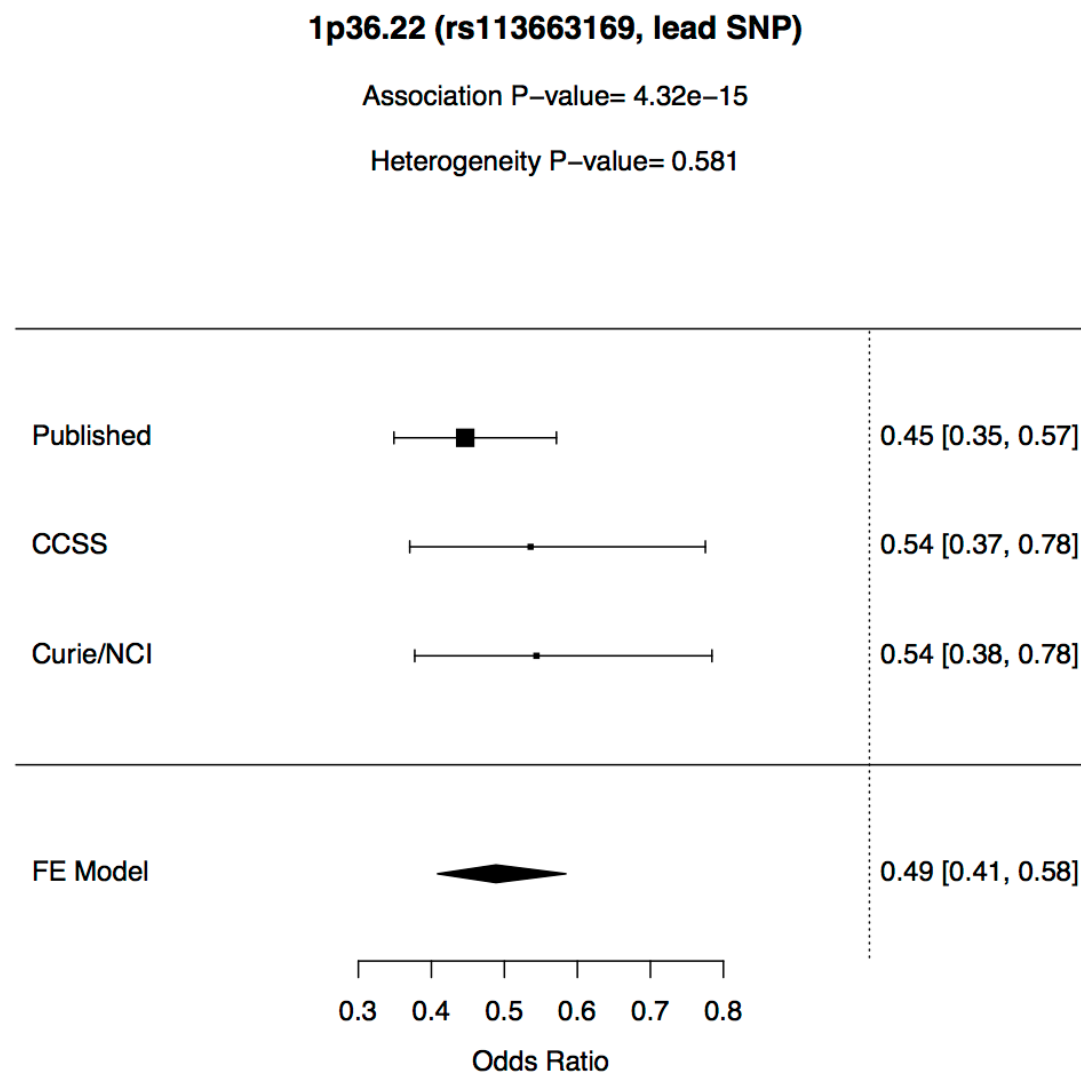

**Supplementary Figure 2B.** Meta-analysis forest plots for the 6p25.1 EWS susceptibility locus.

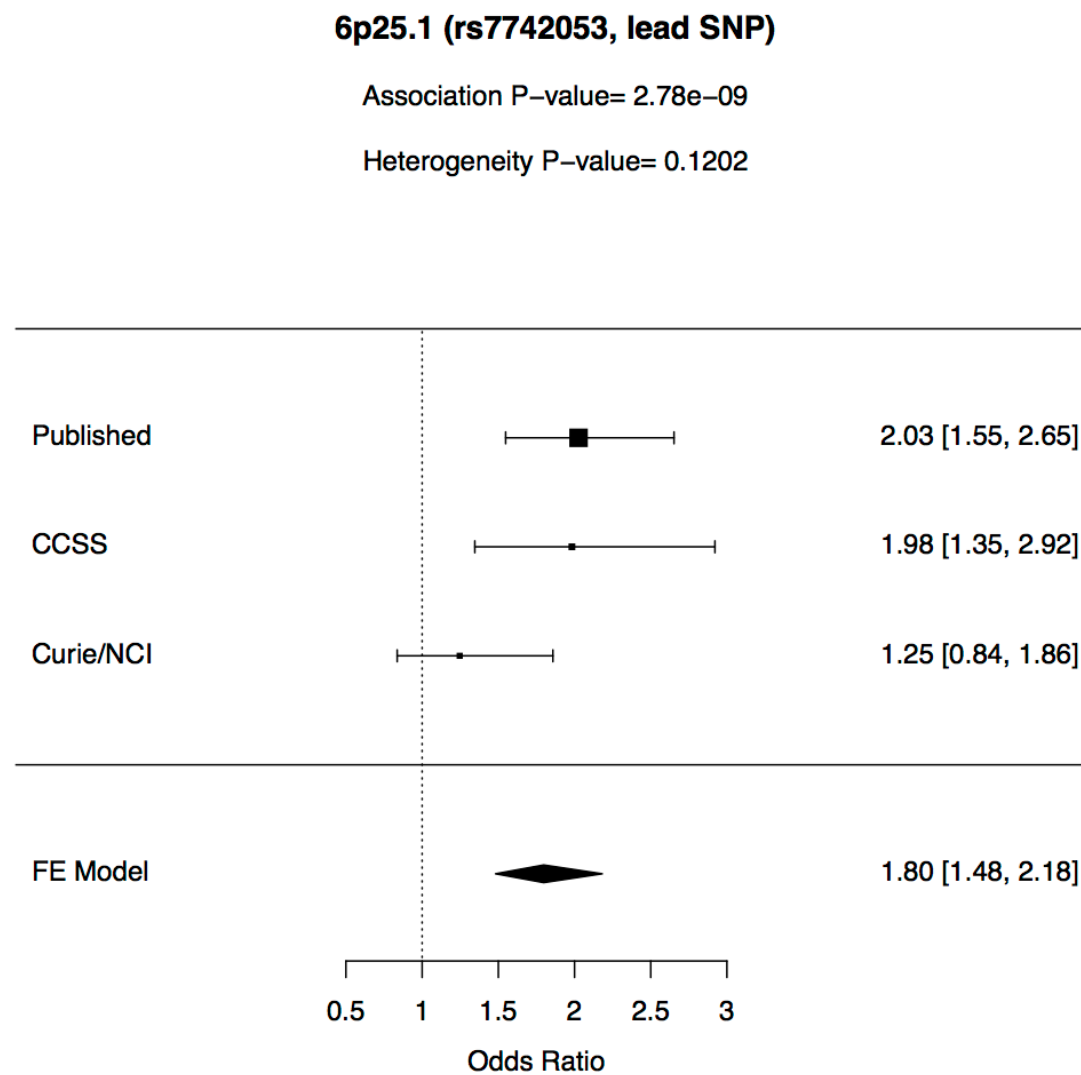

**Supplementary Figure 2C.** Meta-analysis forest plots for the 8q24.23 EWS susceptibility locus.

**8q24.23 (rs7832583, lead + TaqMan SNP)**

Association P-value= 2.13e-07

Heterogeneity P-value= 0.7725

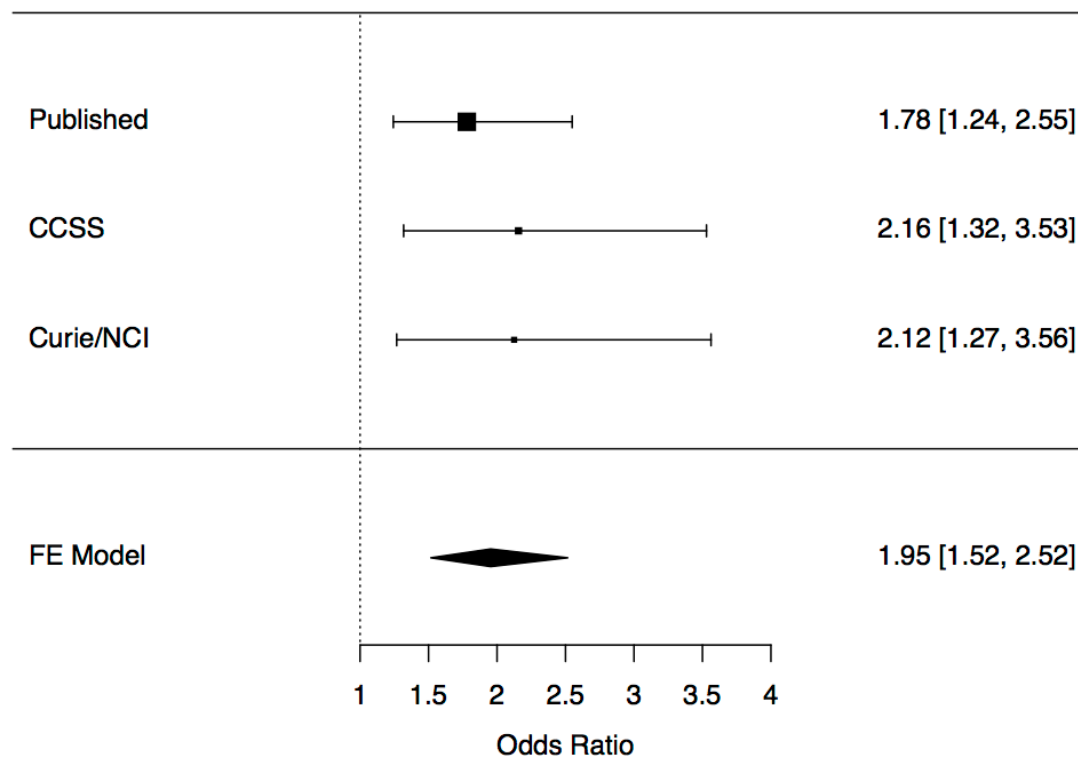

**Supplementary Figure 2D.** Meta-analysis forest plots for the 10q21.3 EWS susceptibility locus.

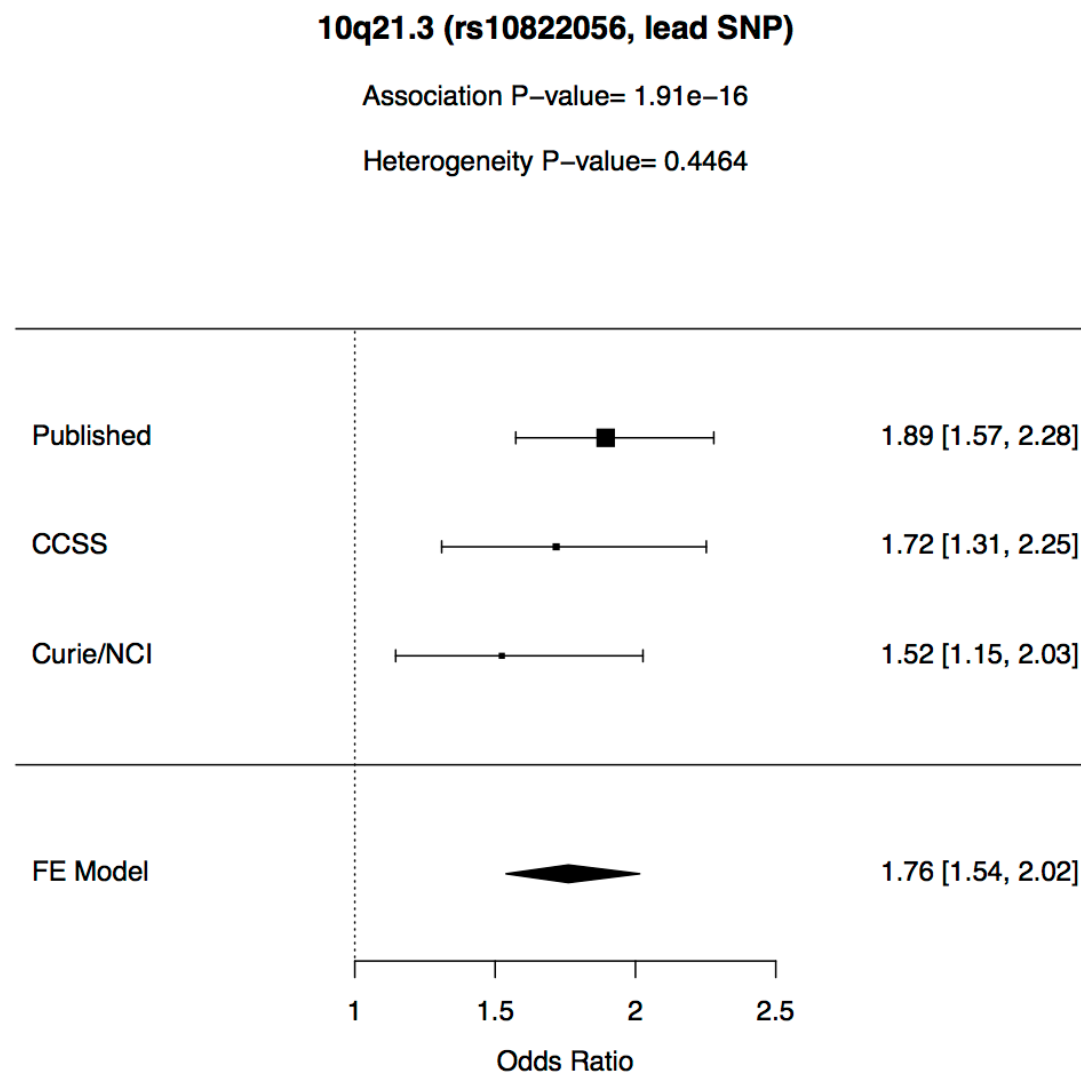

**Supplementary Figure 2E.** Meta-analysis forest plots for the 15q15.1 EWS susceptibility locus.

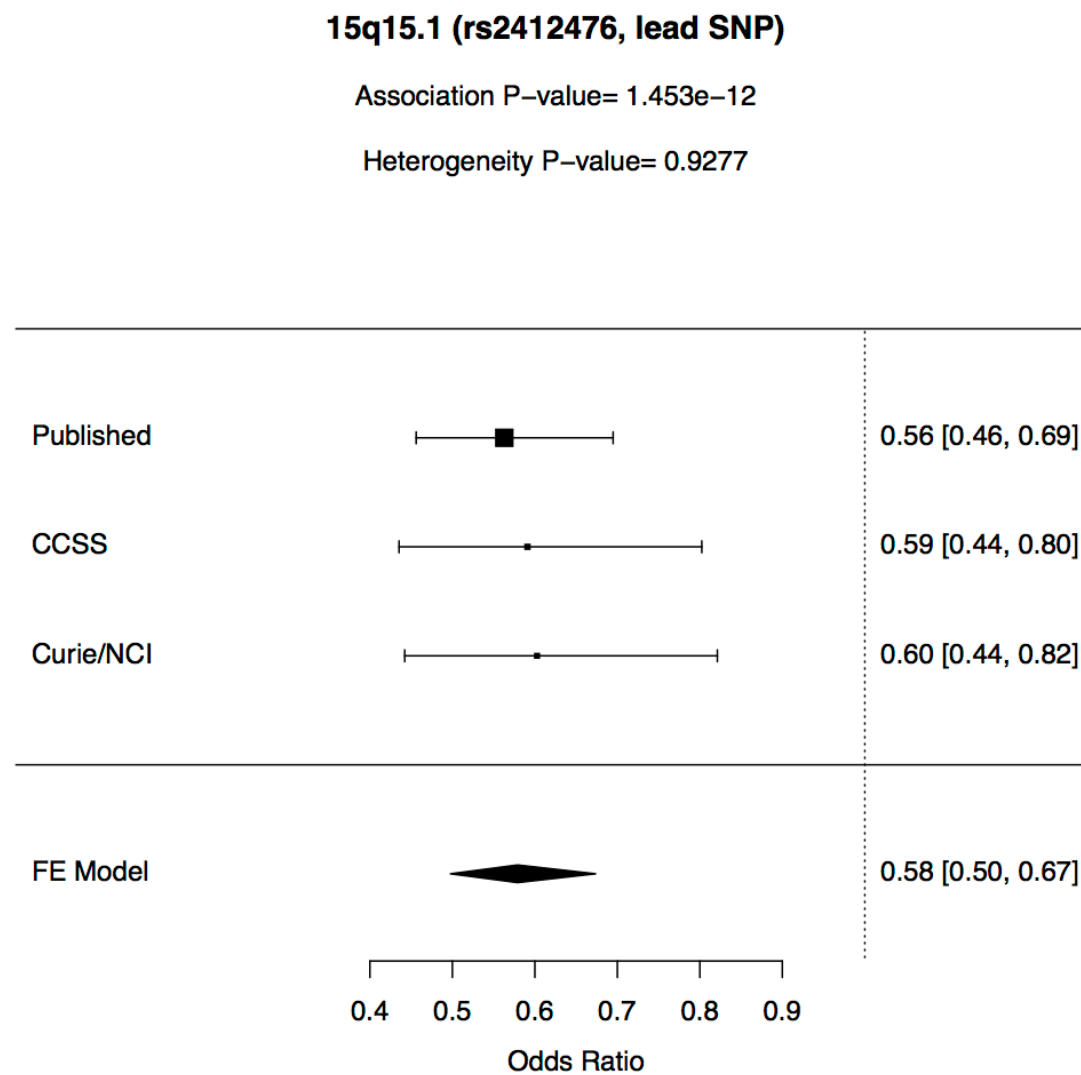

**Supplementary Figure 2F.** Meta-analysis forest plots for the 20p11.22 EWS susceptibility locus.

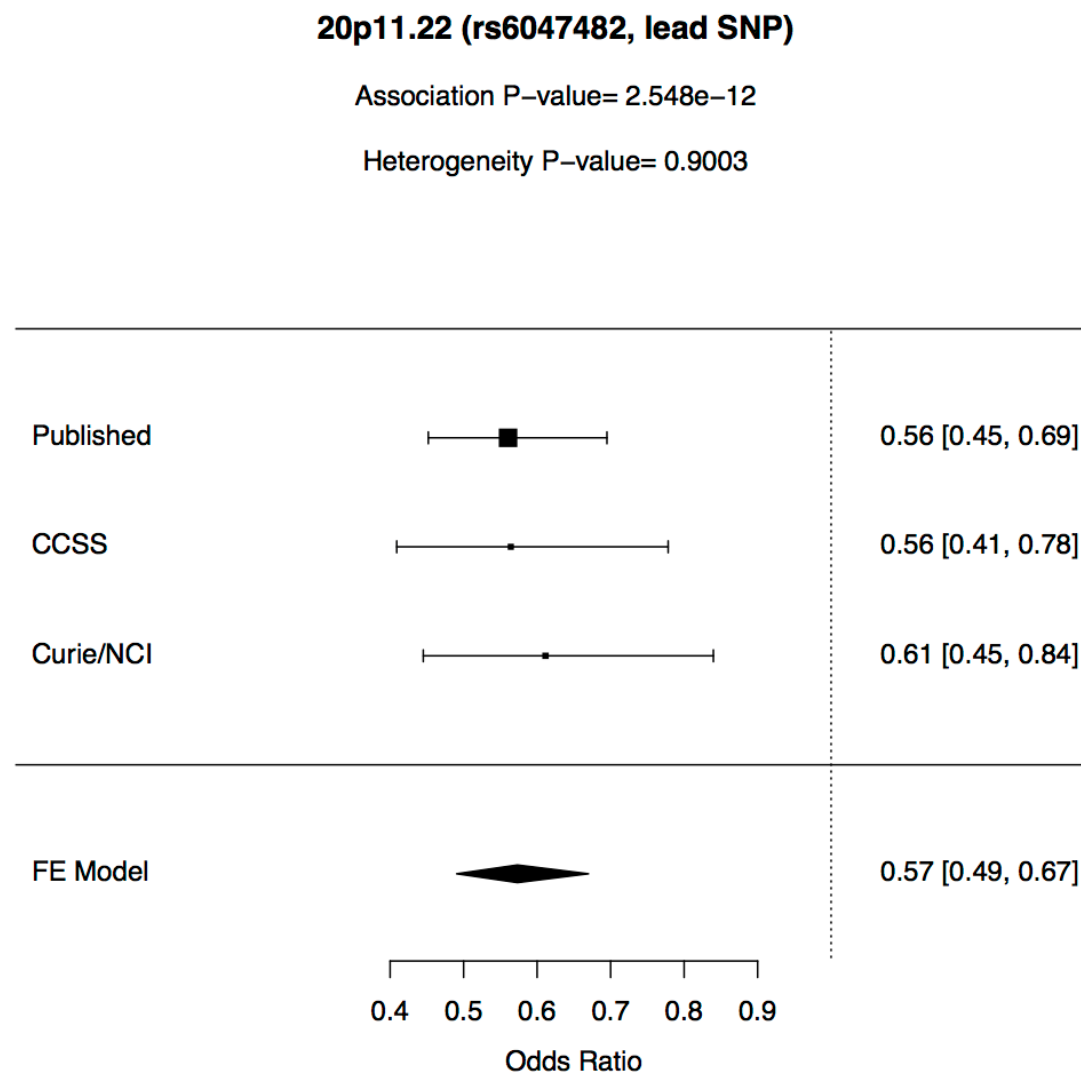

**Supplementary Figure 2G.** Meta-analysis forest plots for the 20p11.23 EWS susceptibility locus.

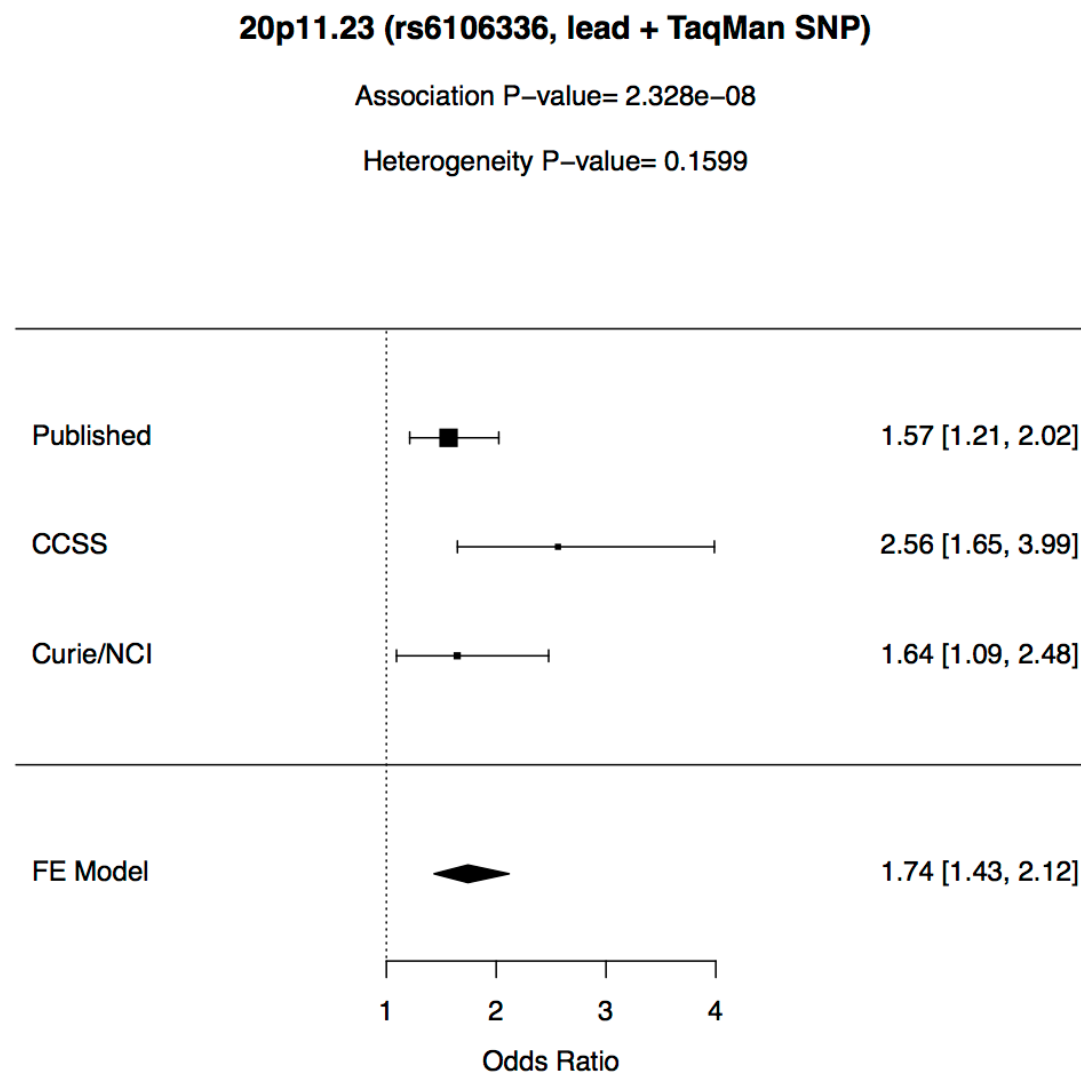



**Supplementary Figure 3A.** Local linkage disequilibrium and association P-value plot for variants in the 1p36.22 EWS susceptibility locus.

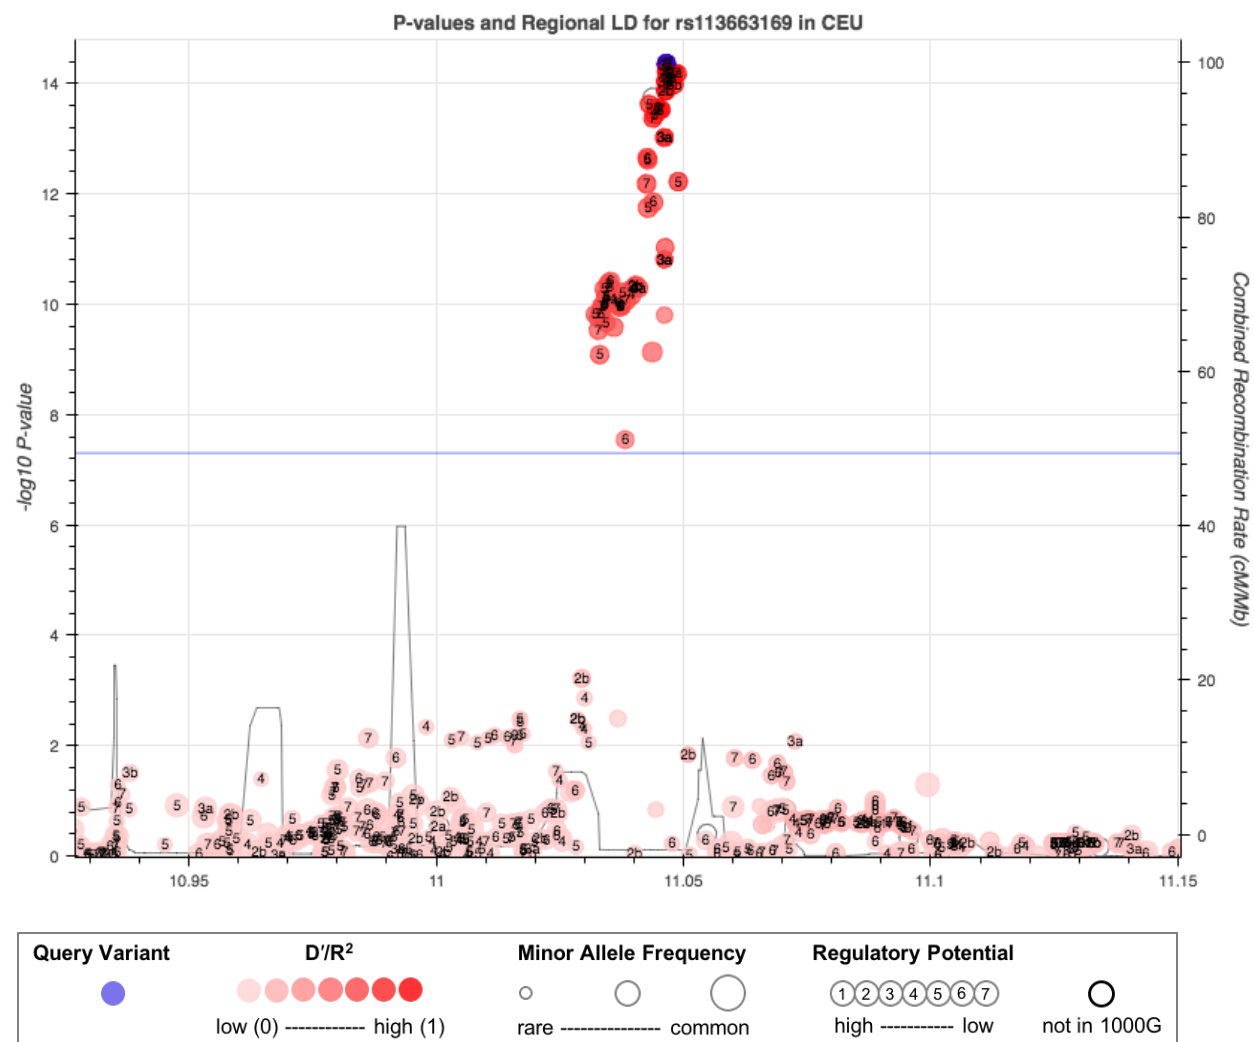

**Supplementary Figure 3B.** Local linkage disequilibrium and association P-value plot for variants in the 6p25.1 EWS susceptibility locus.

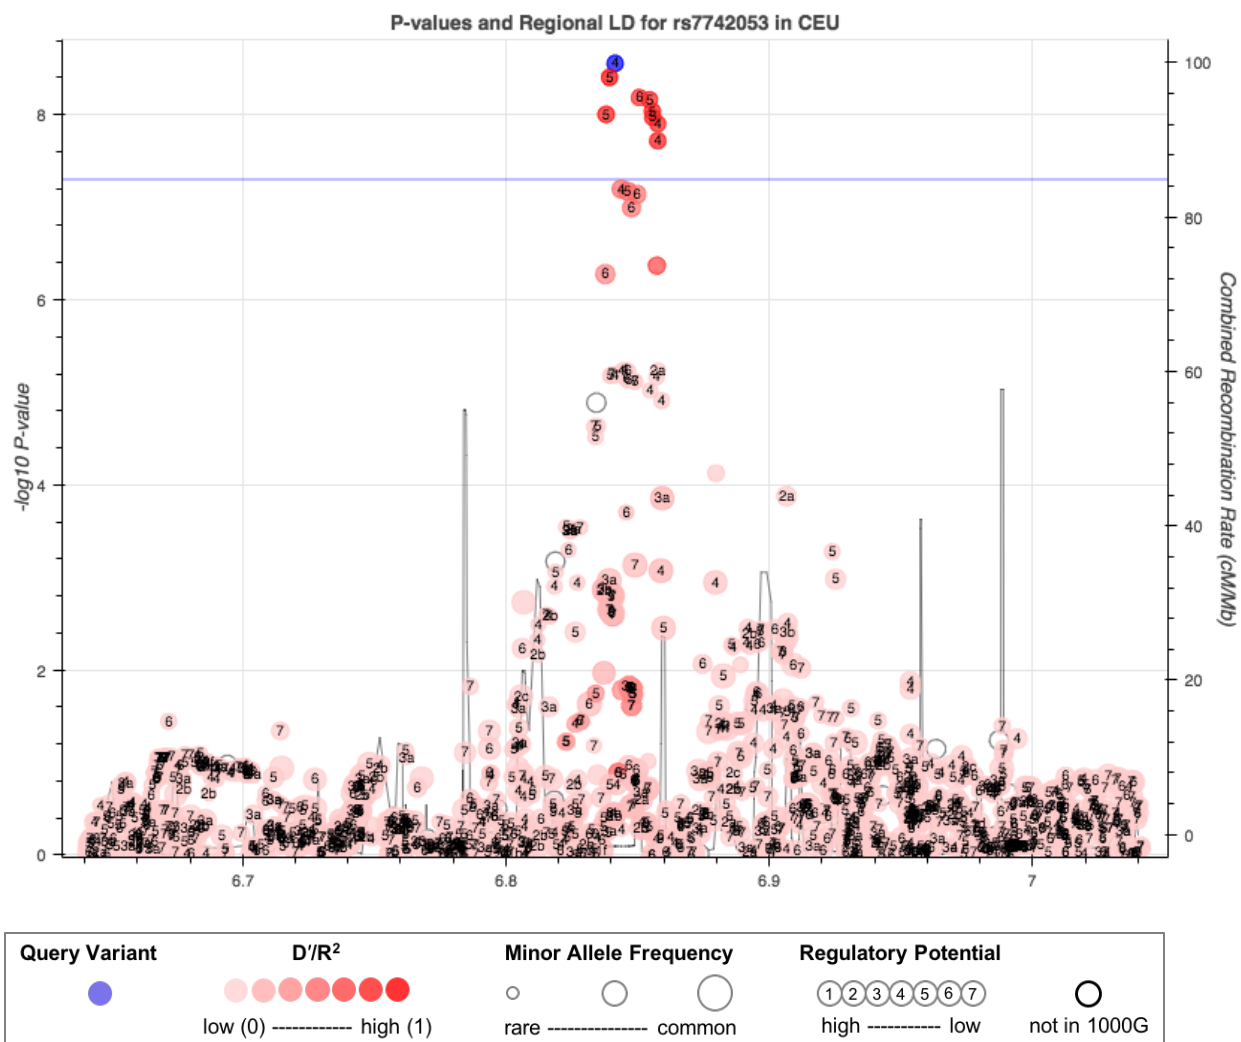

**Supplementary Figure 3C.** Local linkage disequilibrium and association P-value plot for variants in the 8q24.23 EWS susceptibility locus. The region is a gene desert with an uncharacterized long non-coding RNA, *LOC101927915*, and *FAM135B*, family with sequence similarity 135 member B mRNA, the closest transcripts. While the mutational landscape of EWS tumors is generally limited, chromosome 8 is observed to be recurrently gained in EWS tumors. It is notable that this 8q24.23 region is distinct from other established cancer susceptibility regions at 8q24.21.

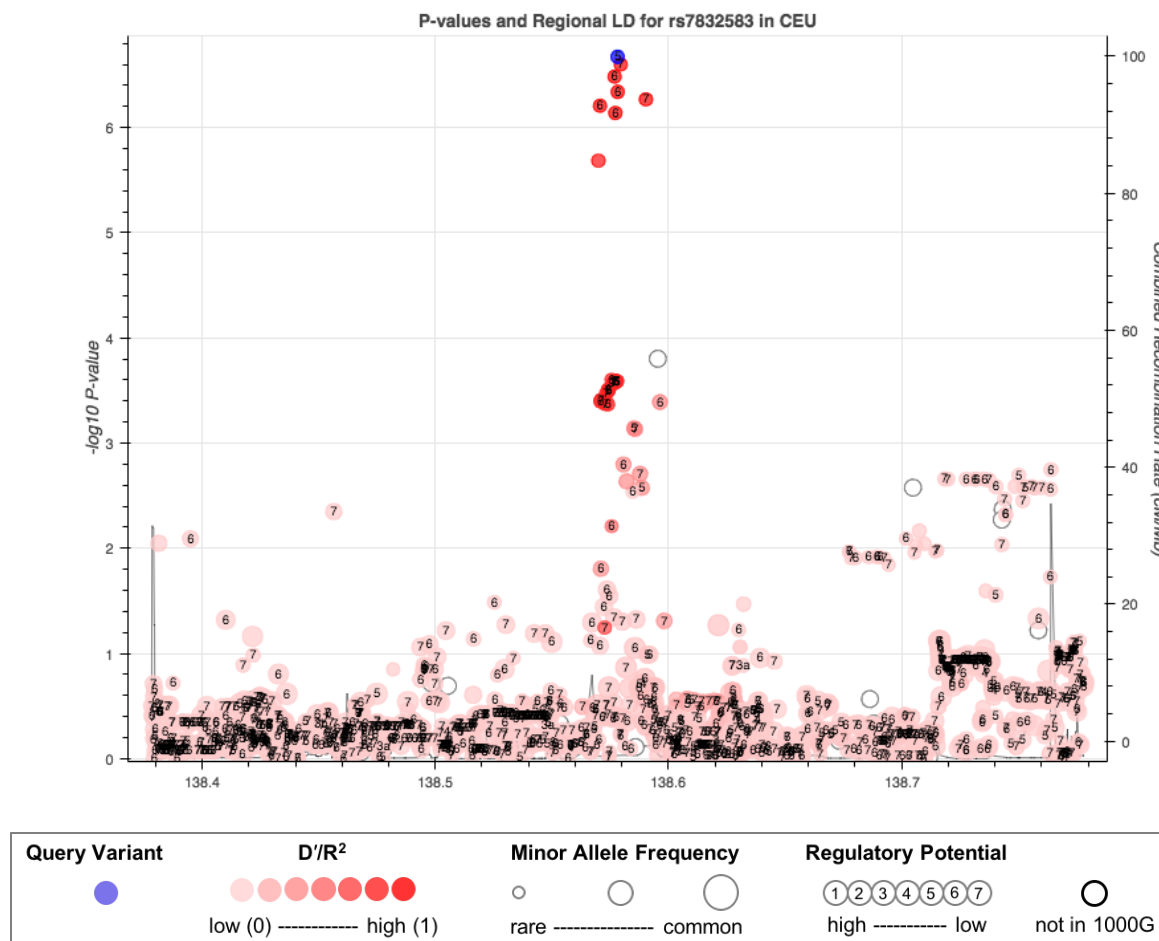

**Supplementary Figure 3D.** Local linkage disequilibrium and association P-value plot for variants in the 10q21.3 EWS susceptibility locus.

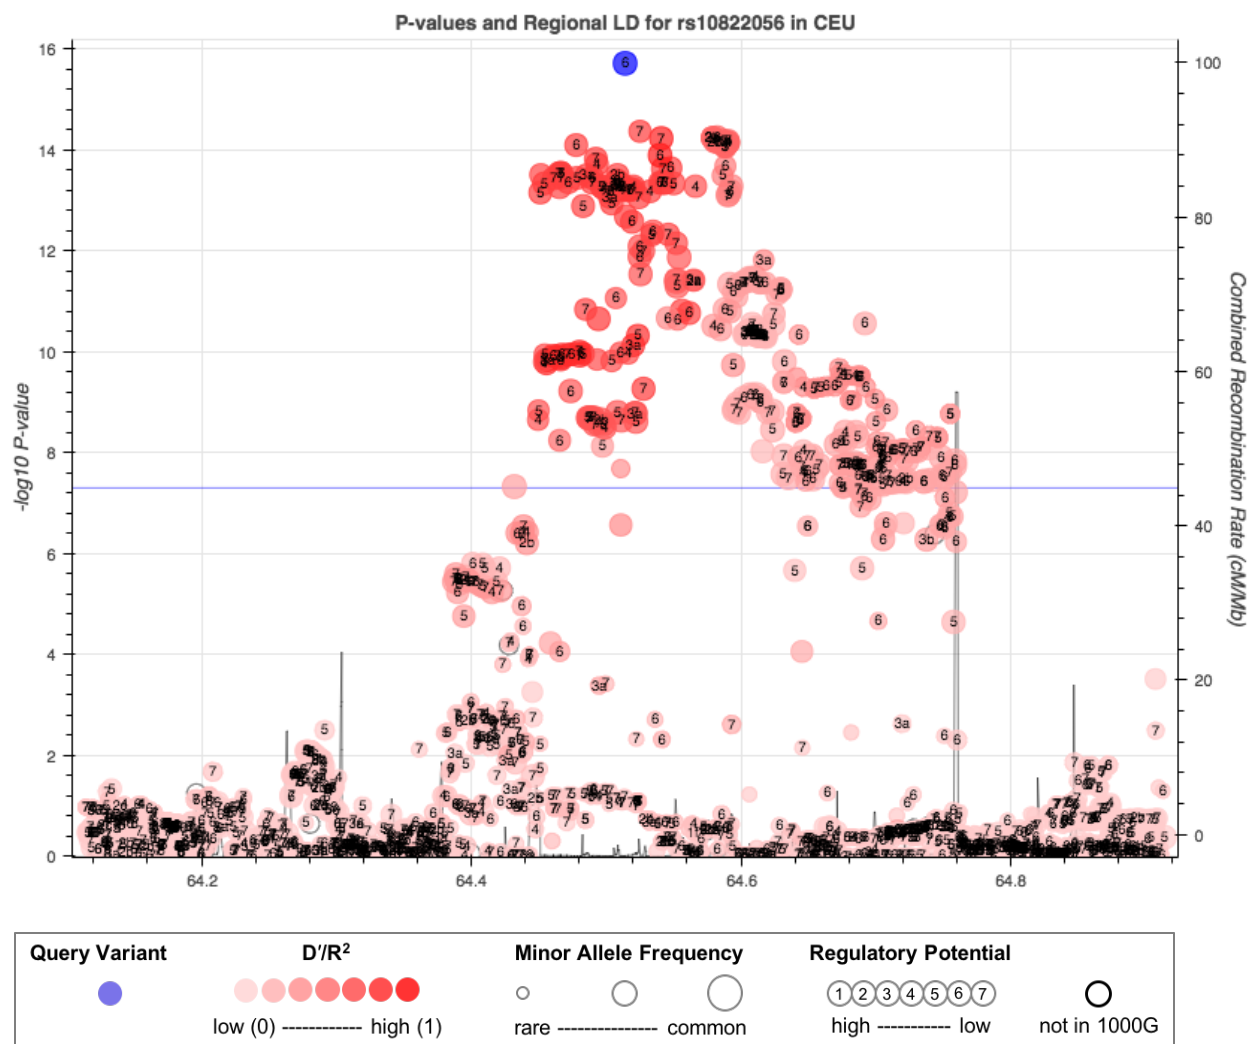

**Supplementary Figure 3E.** Local linkage disequilibrium and association P-value plot for variants in the 15q15.1 EWS susceptibility locus.

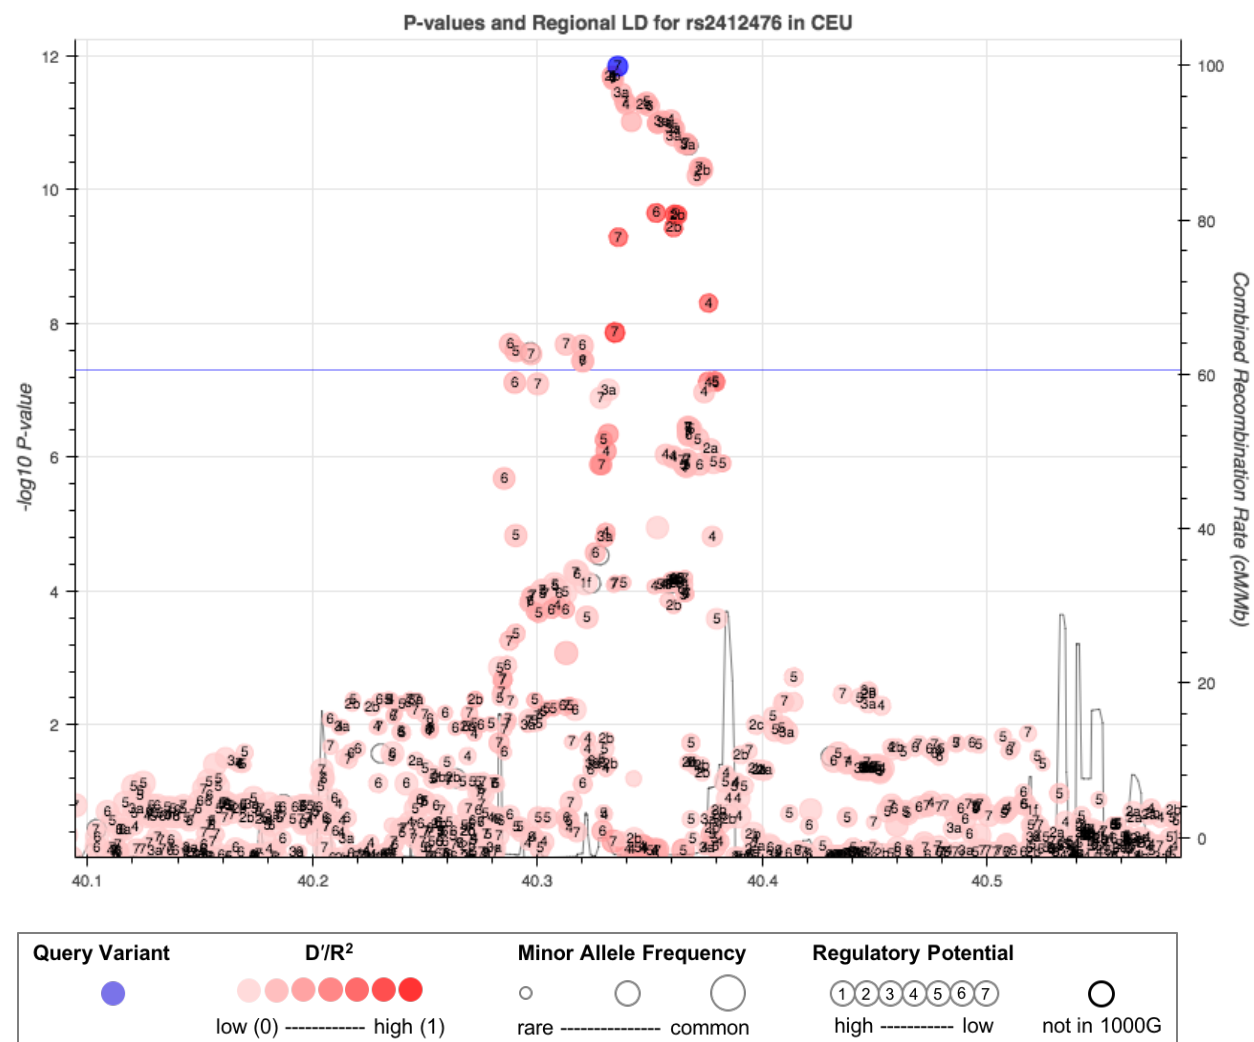

**Supplementary Figure 3F.** Local linkage disequilibrium and association P-value plot for variants in the 20p11.22 EWS susceptibility locus.

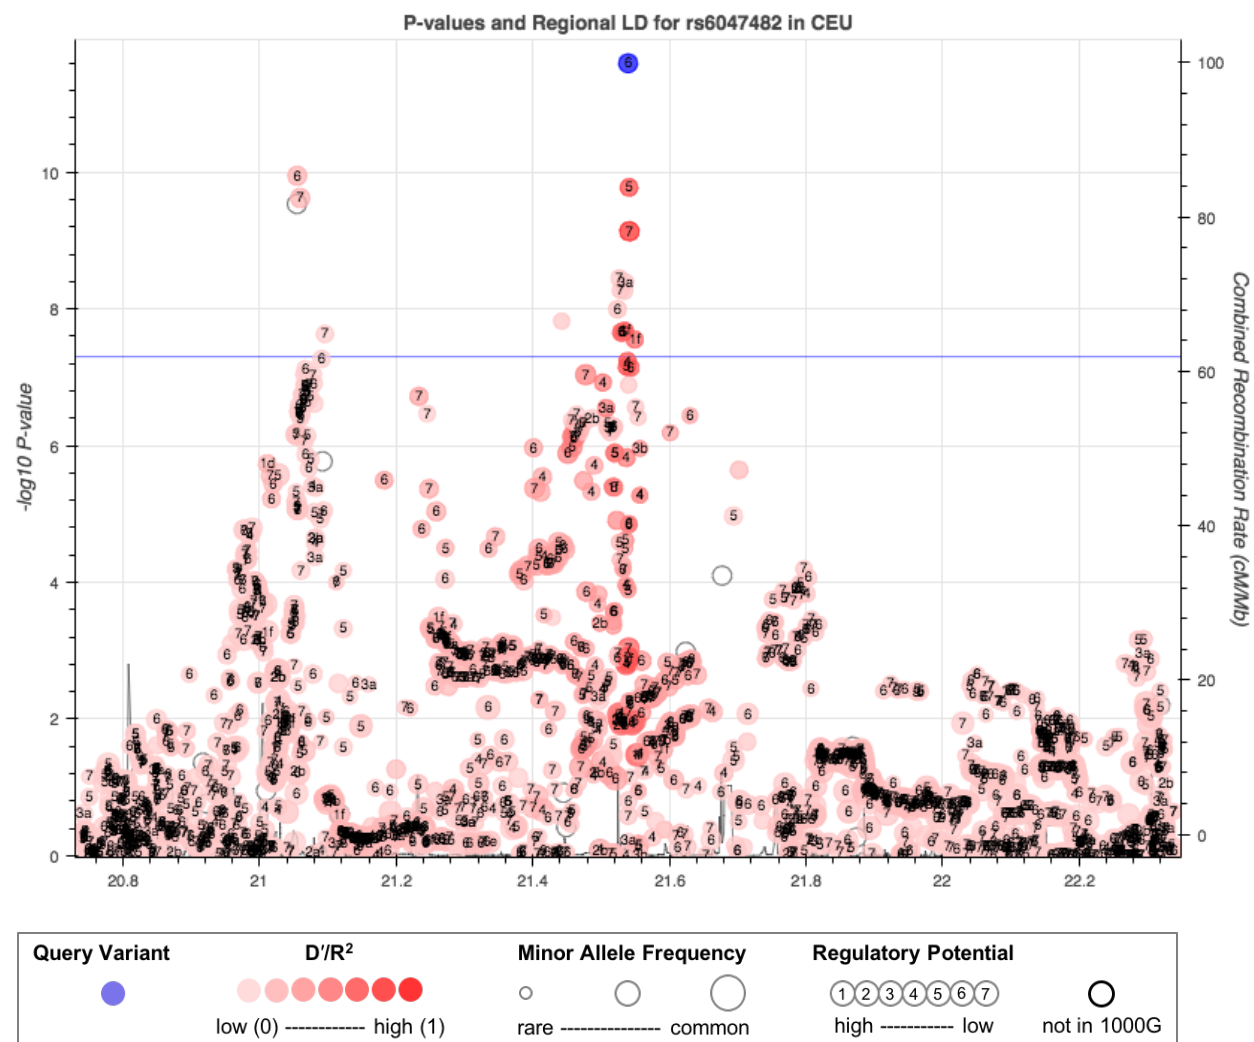

**Supplementary Figure 3G.** Local linkage disequilibrium and association P-value plot for variants in the 20p11.23 EWS susceptibility locus.

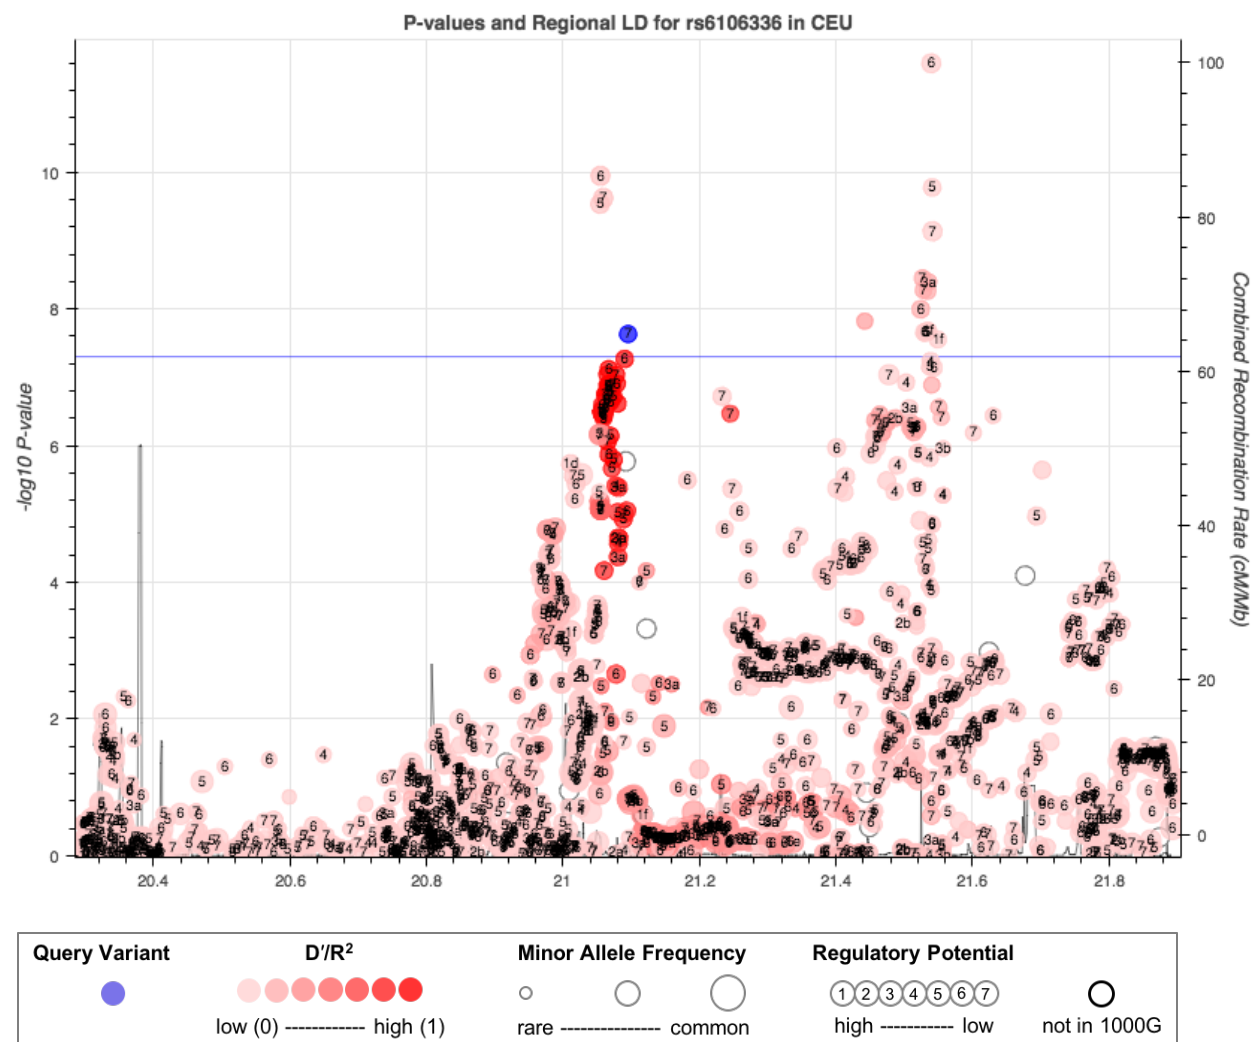

**Supplementary Figure 4A.** Plot of conditional analysis for the 1p36.22 EWS susceptibility region. Grey points are for the overall meta-analysis association and blue points are for the conditional analysis when conditioning on rs113663169.

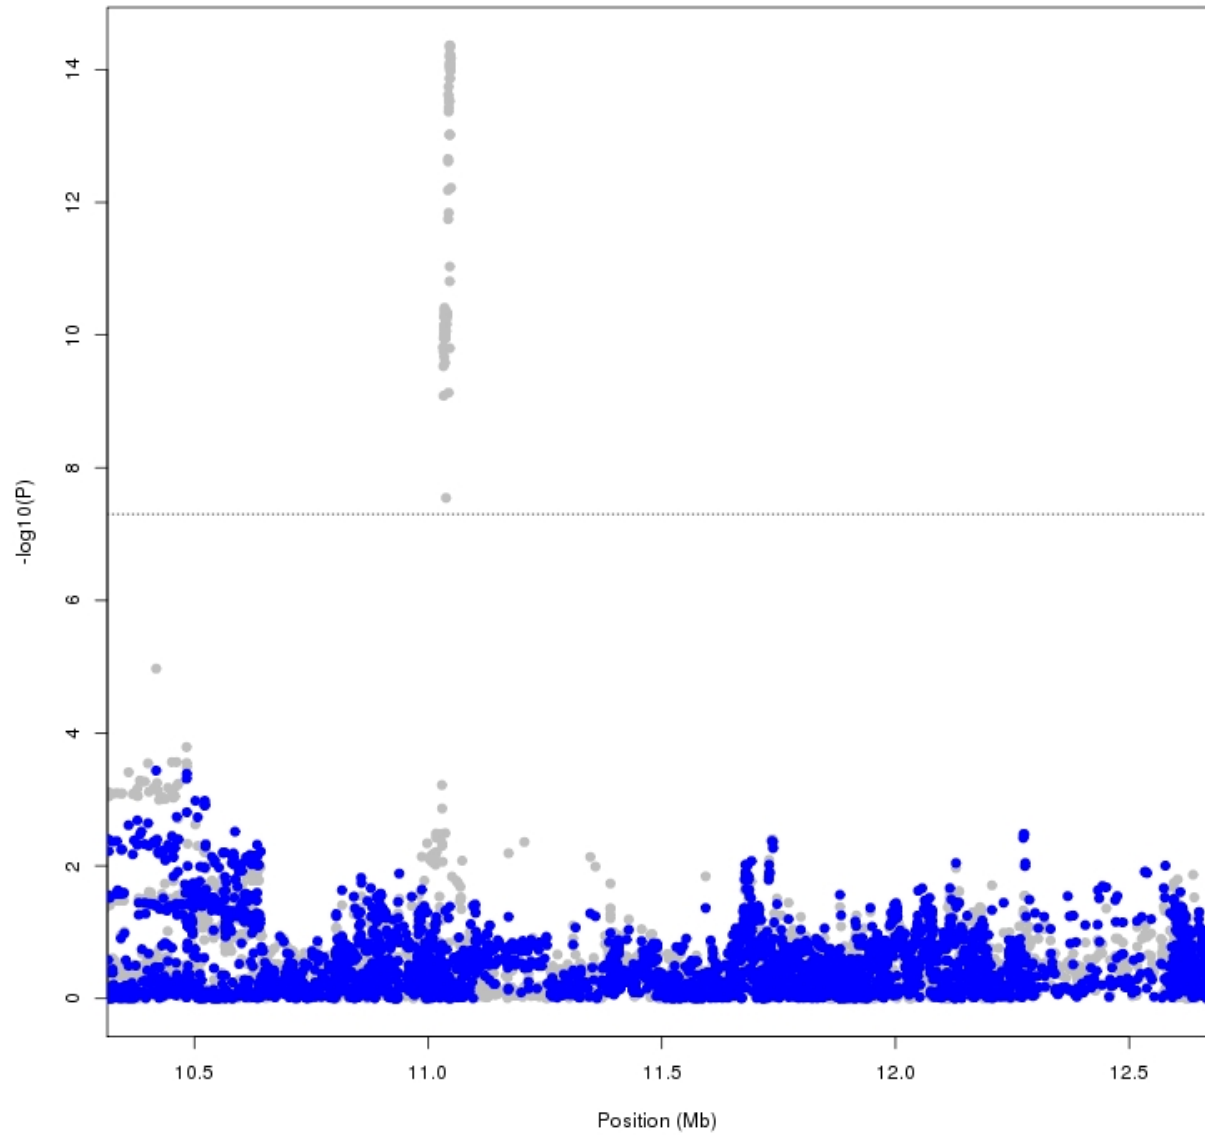



**Supplementary Figure 4B.** Plot of conditional analysis for the 6p25.1 EWS susceptibility region. Grey points are for the overall meta-analysis association and blue points are for the conditional analysis when conditioning on rs7742053.

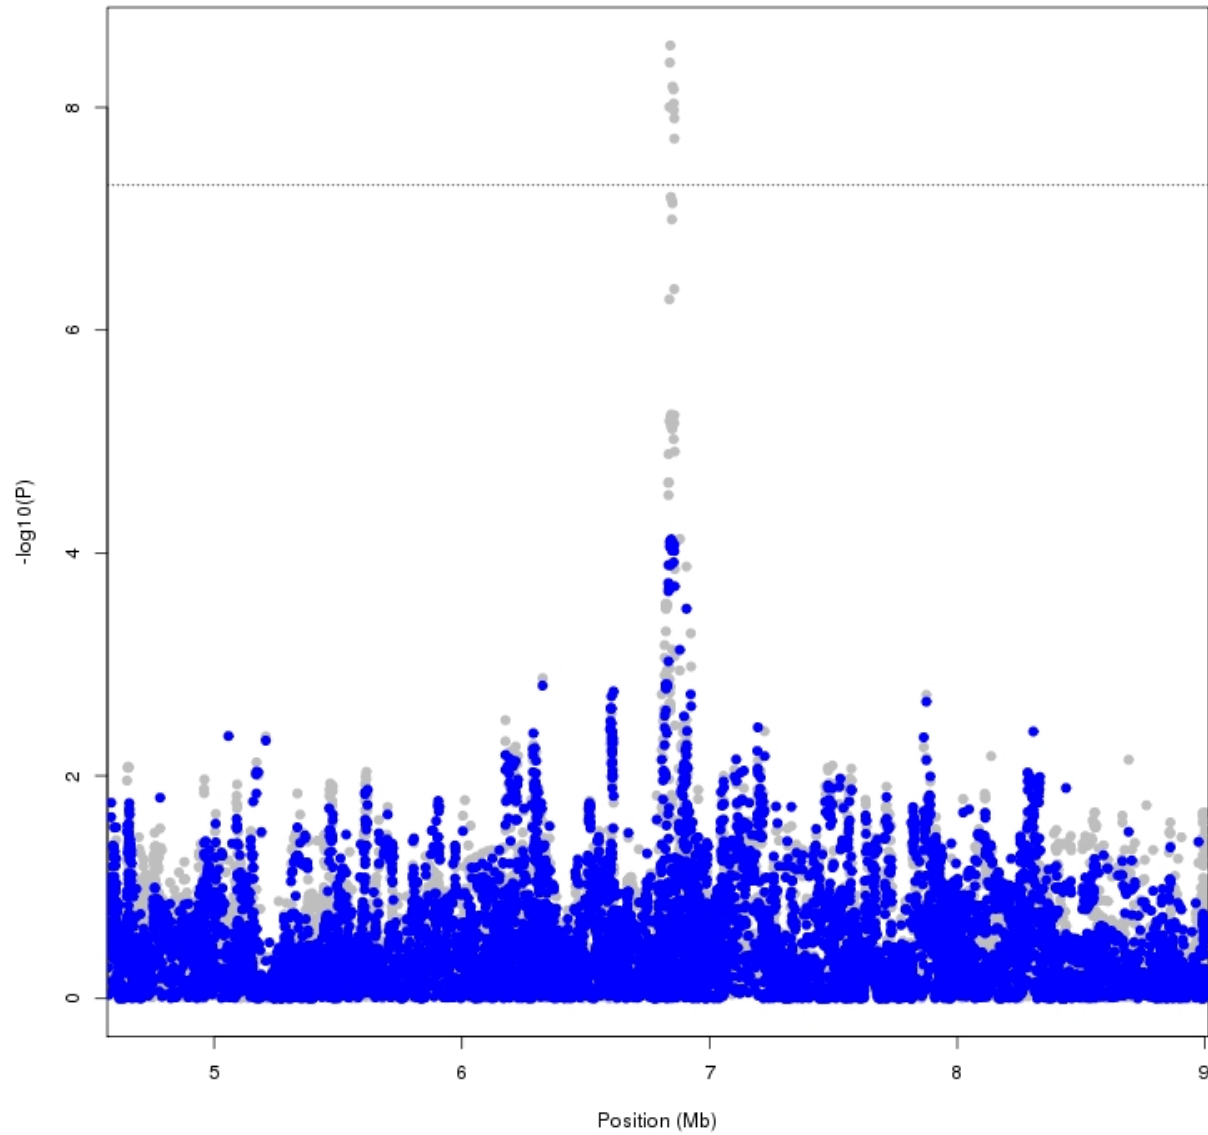

**Supplementary Figure 4C.** Plot of conditional analysis for the 8q24.23 EWS susceptibility region. Grey points are for the overall meta-analysis association and blue points are for the conditional analysis when conditioning on rs7832583.

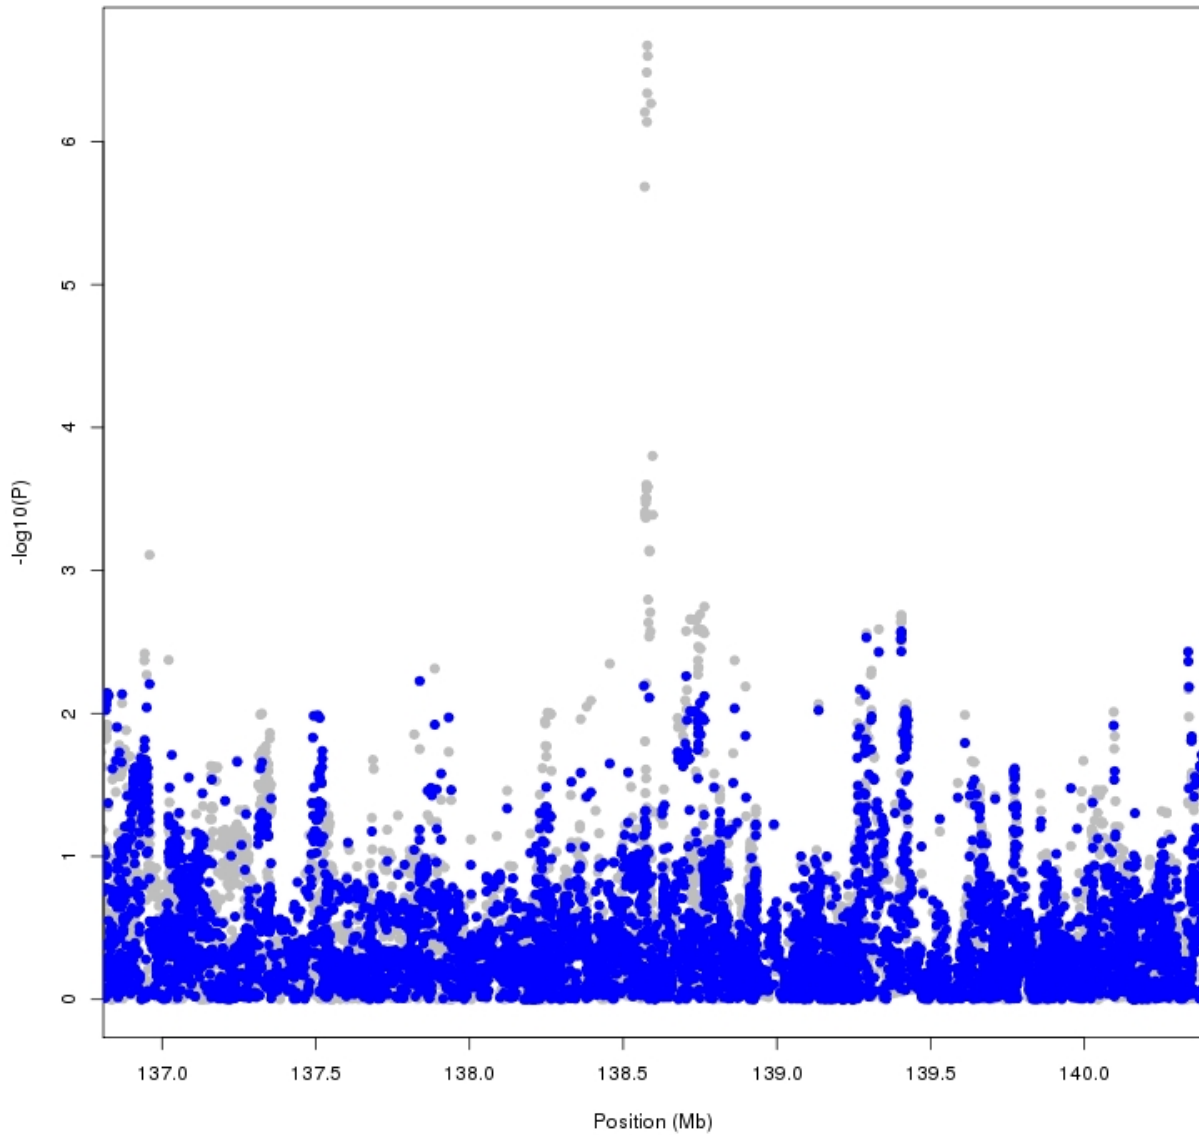

**Supplementary Figure 4D.** Plot of conditional analysis for the 10q21.3 EWS susceptibility region. Grey points are for the overall meta-analysis association and blue points are for the conditional analysis when conditioning on rs10822056.

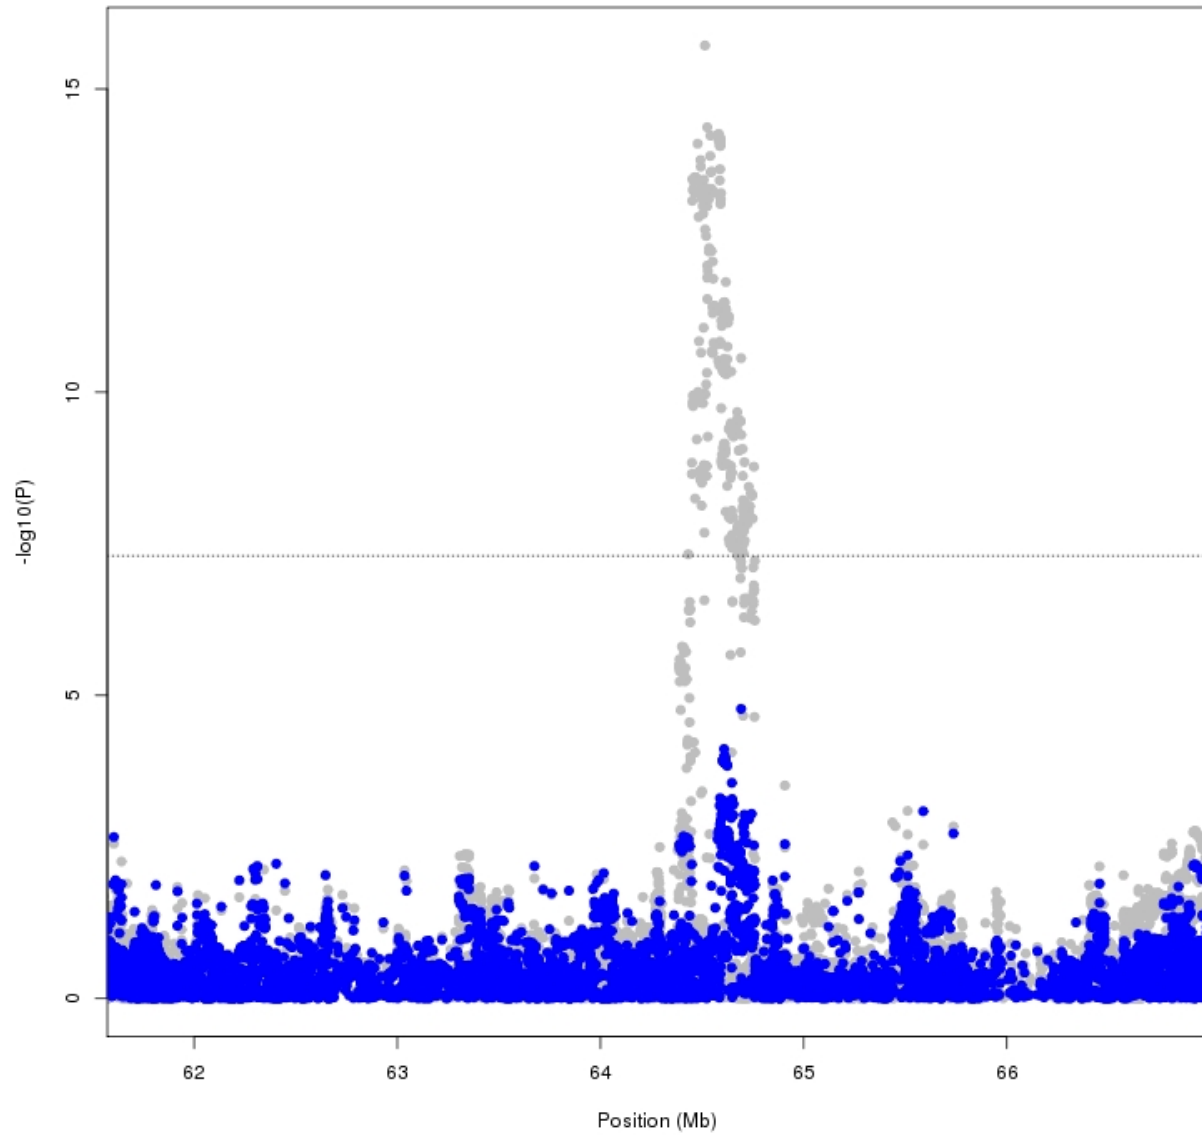

**Supplementary Figure 4E.** Plot of conditional analysis for the 15q15.1 EWS susceptibility region. Grey points are for the overall meta-analysis association and blue points are for the conditional analysis when conditioning on rs2412476.

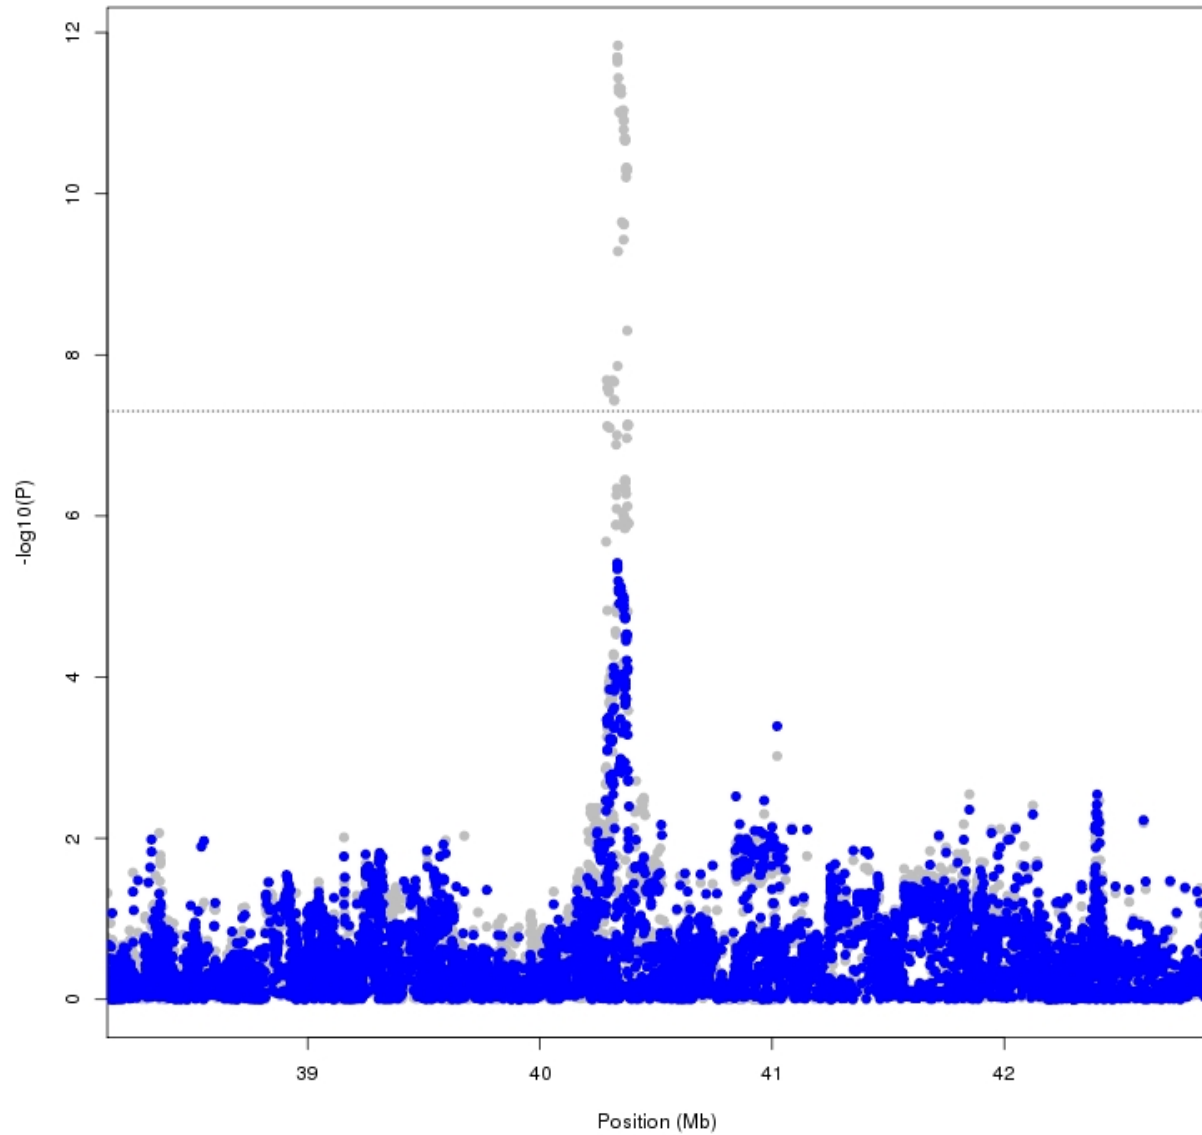

**Supplementary Figure 4F.** Plot of conditional analysis for the 20p11.22-23 EWS susceptibility region. Grey points are for the overall meta-analysis association, blue points are for the conditional analysis when conditioning on rs6047482 and red points are for the conditional analysis when conditioning on both rs6047482 and rs6106336.

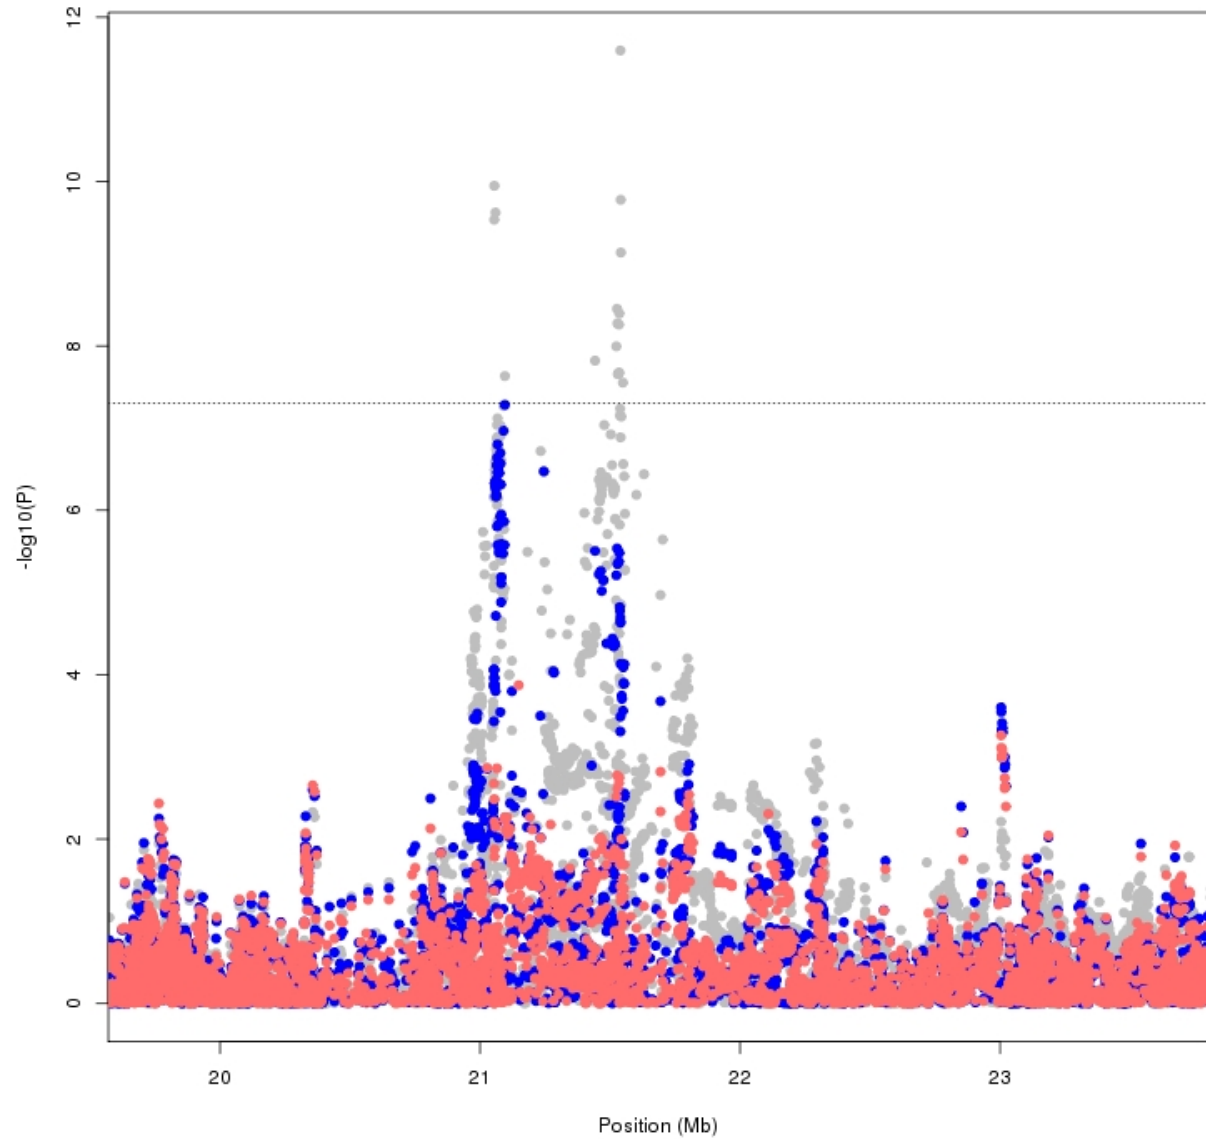

**Supplementary Figure 5A.** TaqMan replication of 6p25.1 locus (rs7744366) in independent European and German sets. The correlation with the 6p25.1 lead SNP (rs7742053) is an  $R^2$  of 0.86.

**6p25.1 (rs7744366, TaqMan SNP)**

Association P-value=  $1.3e-18$

Heterogeneity P-value= 0.1197

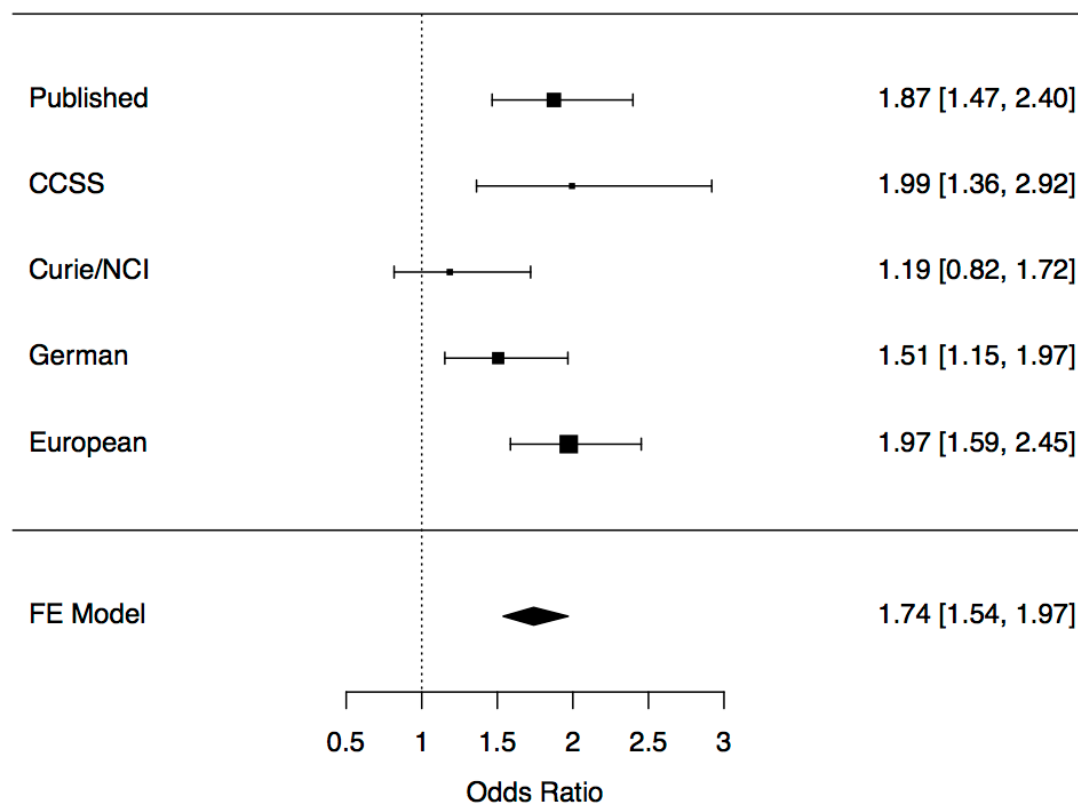

**Supplementary Figure 5B.** TaqMan replication of 8q24.23 locus (rs7832583) in independent European and German sets.

**8q24.23 (rs7832583, lead + TaqMan SNP)**

Association P-value=  $1.4\text{e-}07$

Heterogeneity P-value= 0.1254

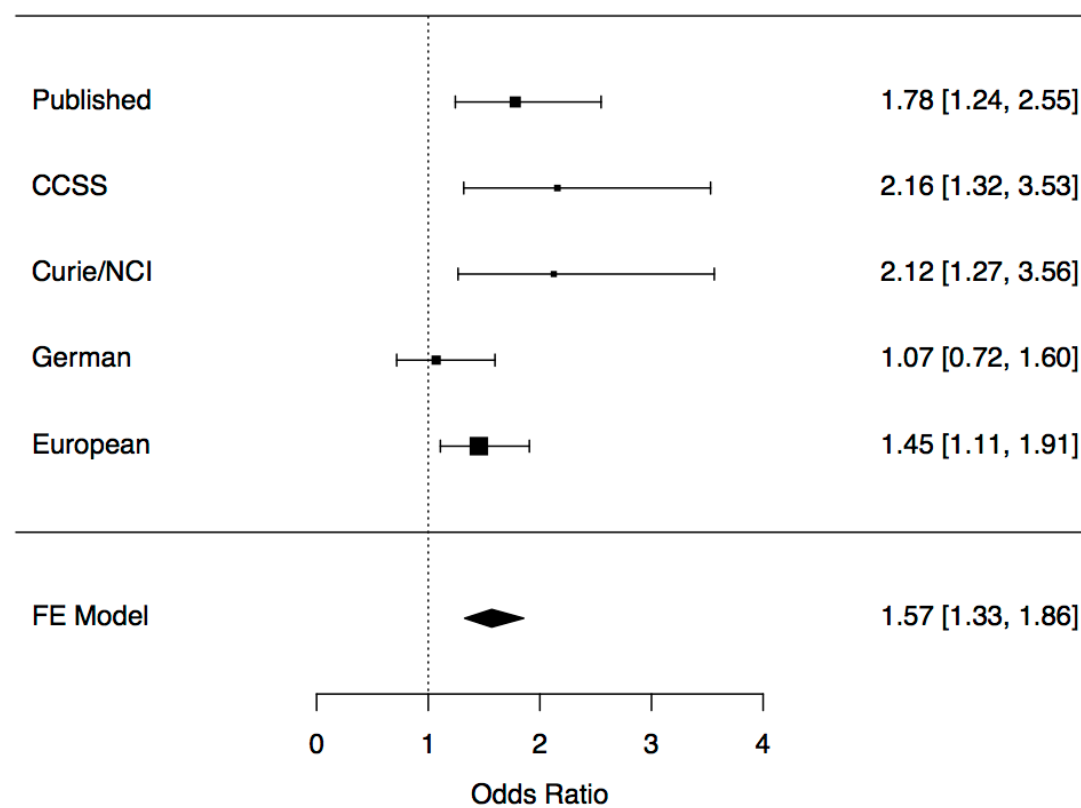

**Supplementary Figure 5C.** TaqMan replication of 20p11.22 locus (rs12106193) in independent European and German sets. The correlation with the 20p11.22 lead SNP (rs6047482) is an  $R^2$  of 0.67.

**20p11.22 (rs12106193, TaqMan SNP)**

Association P-value=  $4.28e-16$

Heterogeneity P-value= 0.5865

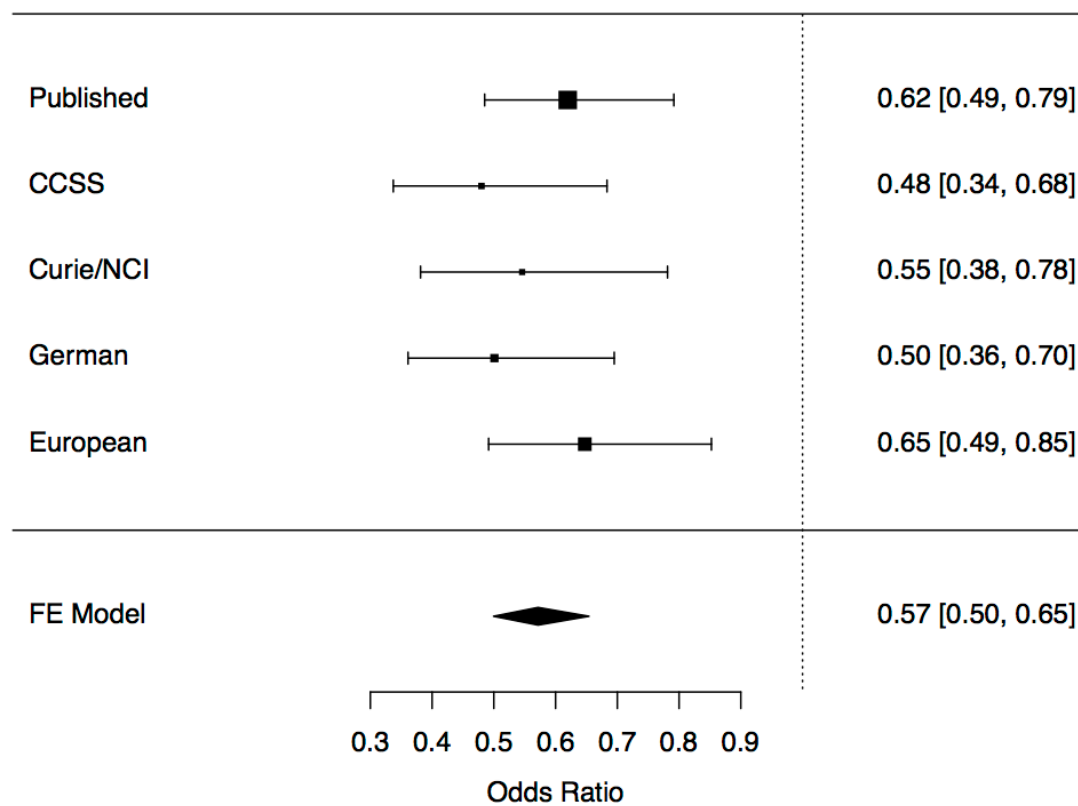



**Supplementary Figure 5D.** TaqMan replication of 20p11.23 locus (rs6106336) in independent European and German sets.

**20p11.23 (rs6106336, lead + TaqMan SNP)**

Association P-value= 1.675e-08

Heterogeneity P-value= 0.0488

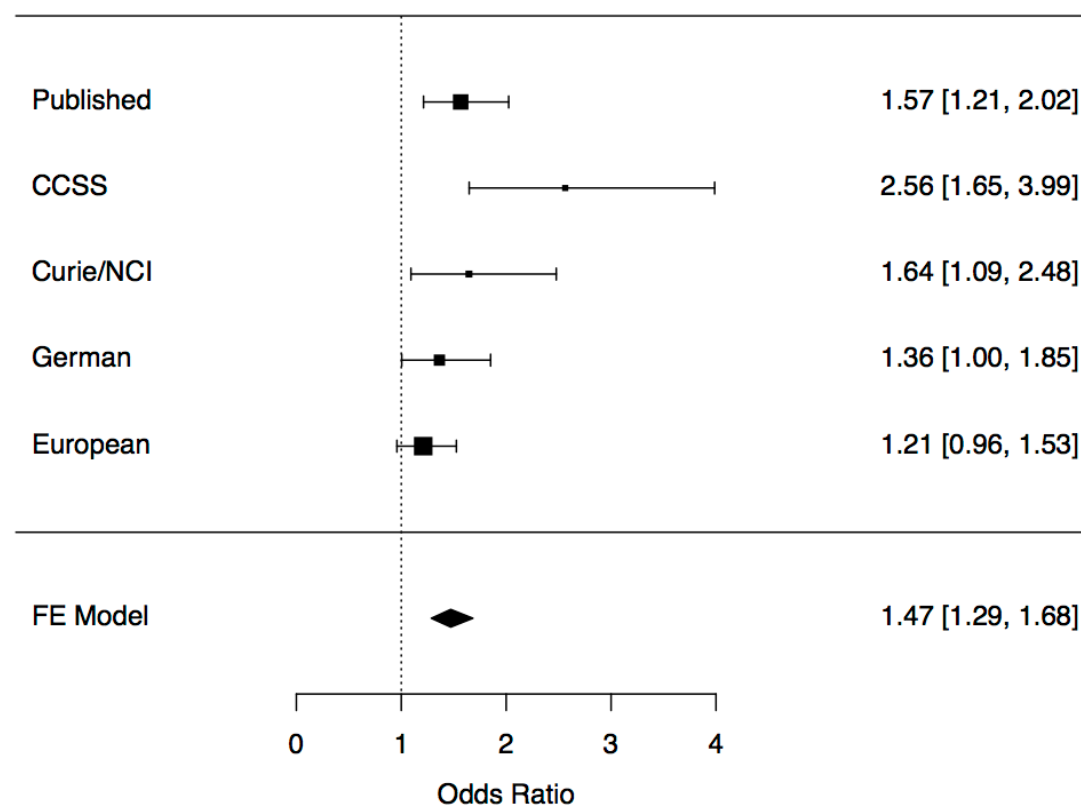

**Supplementary Figure 6.** Expression levels of *NKX2-2*, *KIZ* and *RREB1* in different sarcoma subtypes and pediatric solid tumors. Data are displayed as box-plots. Horizontal bars represent the medians, the boxes the interquartile range, and whiskers the 10<sup>th</sup> and 90<sup>th</sup> percentile, respectively. The number of analyzed samples per tumor entity is given in parentheses. ASPS, alveolar soft part sarcoma; ATRT, atypical-teratoid/rhabdoid-tumor; EW\_LIKE, Ewing-like sarcoma; GIST, gastrointestinal stromal tumor; R-ARMS\_pos, rhabdomyosarcoma alveolar fusion-positive; R-ARMS\_neg, rhabdomyosarcoma alveolar fusion-negative; R-ERMS\_neg, rhabdomyosarcoma embryonal fusion-negative; UNDIFF\_sarcoma, undifferentiated sarcoma.

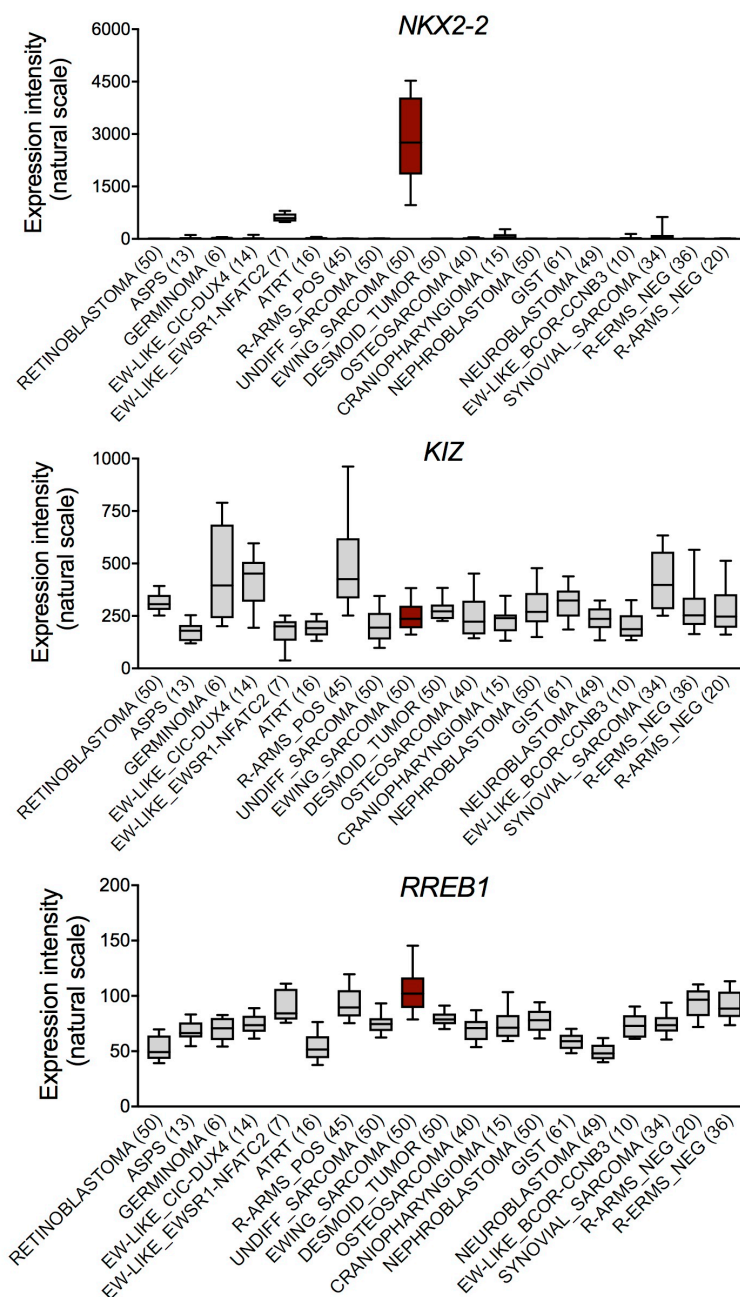

**Supplementary Figure 7.** Integrative view of lead SNP at 6p25.1 (rs7742053) and highly correlated CEU variants from LDlink, RefSeq genes, GGAA nucleotide repeat sequences, H3K27ac markers of open chromatin and FLI1 ChIP-seq for *EWSR1-FLI1* fusion binding in EWS cell lines A673 and TC71. A673 siEF1, A673 with siRNA-mediated knock down of *EWSR1-FLI1*.

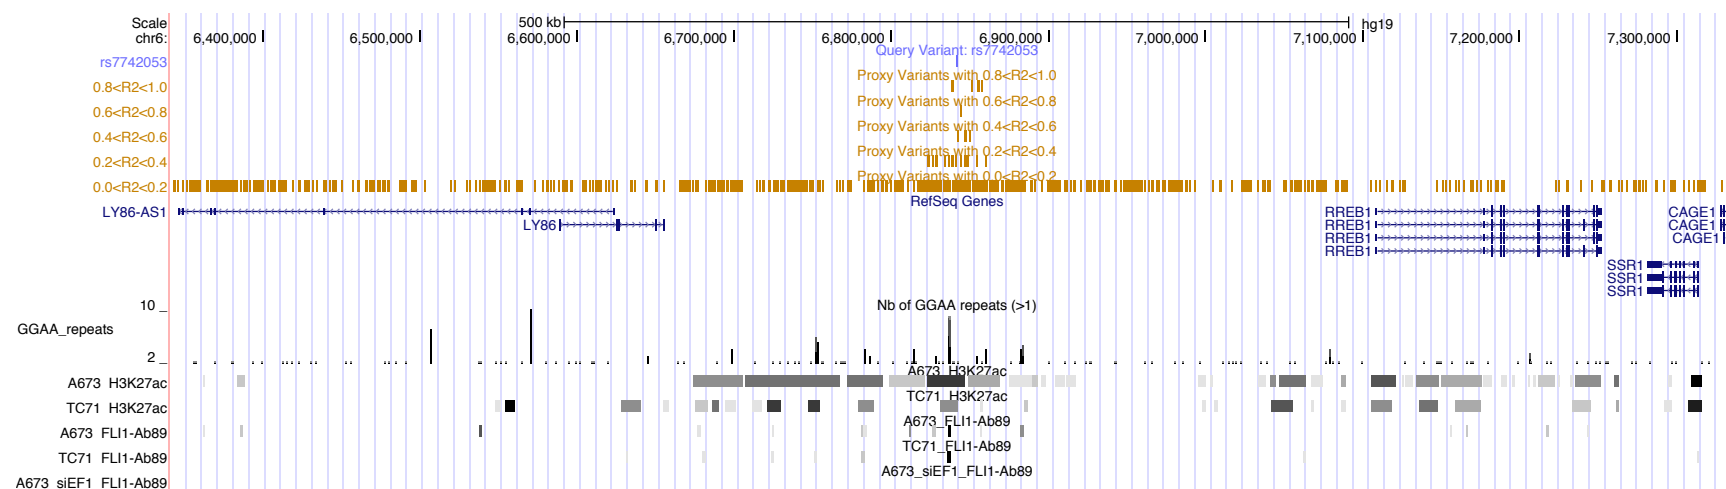

**Supplementary Figure 8.** Distance to EWSR1-FLI1 binding sites for the set of the top 6 EWS susceptibility variants and in a collection of 1,000 randomly selected SNPs from the same chromosomes in the EWS A673 and TC71 cell lines. There was a significantly closer distance to the nearest EWSR1-FLI1 binding site in EWS susceptibility variants (Wilcoxon P-value=0.0025 and 0.0009 in the A673 and TC71 cell lines, respectively), indicating enrichment of these binding sites near EWS susceptibility loci.

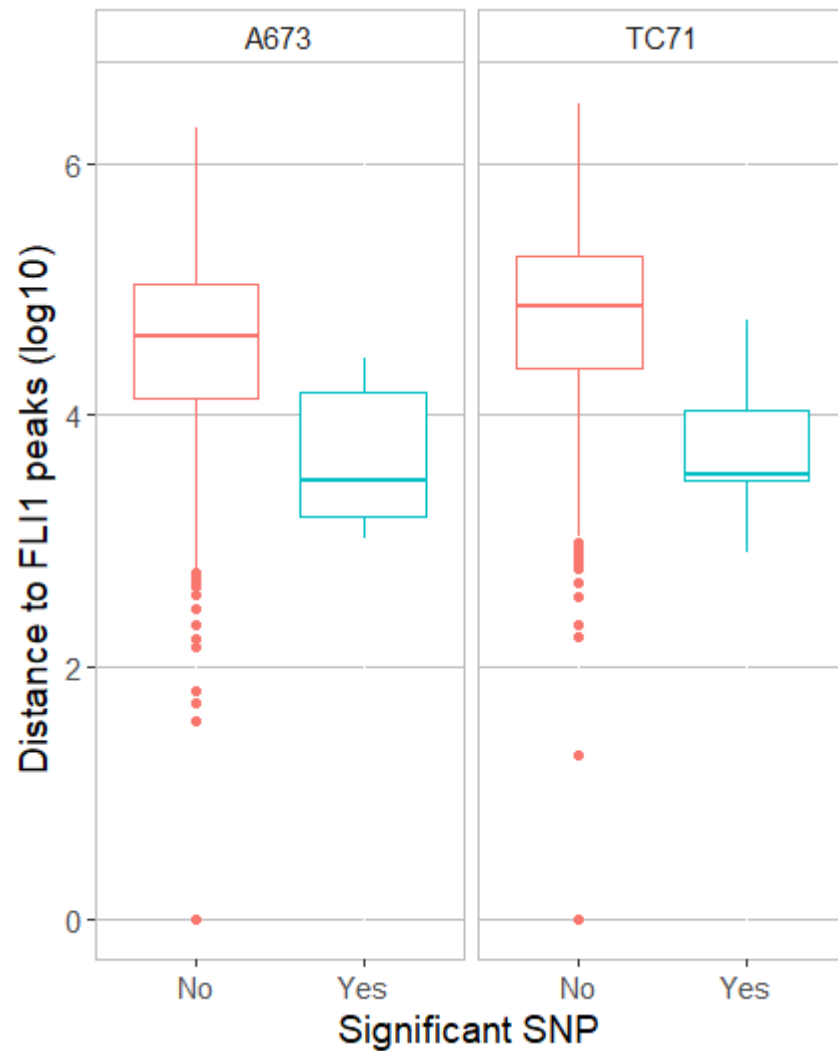

**Supplementary Figure 9.** *In vivo* fold change in gene expression of all coding genes and long non-coding RNAs at the 6p25.1 locus (brown), 8q24.23 locus (gray), and 20p11.22-23 locus (green) after doxycycline (Dox)-induced knock down of EWSR1-FLI1 in xenografts generated from A673/TR/shEF1 EWS cells grown in immunocompromised NSG mice.

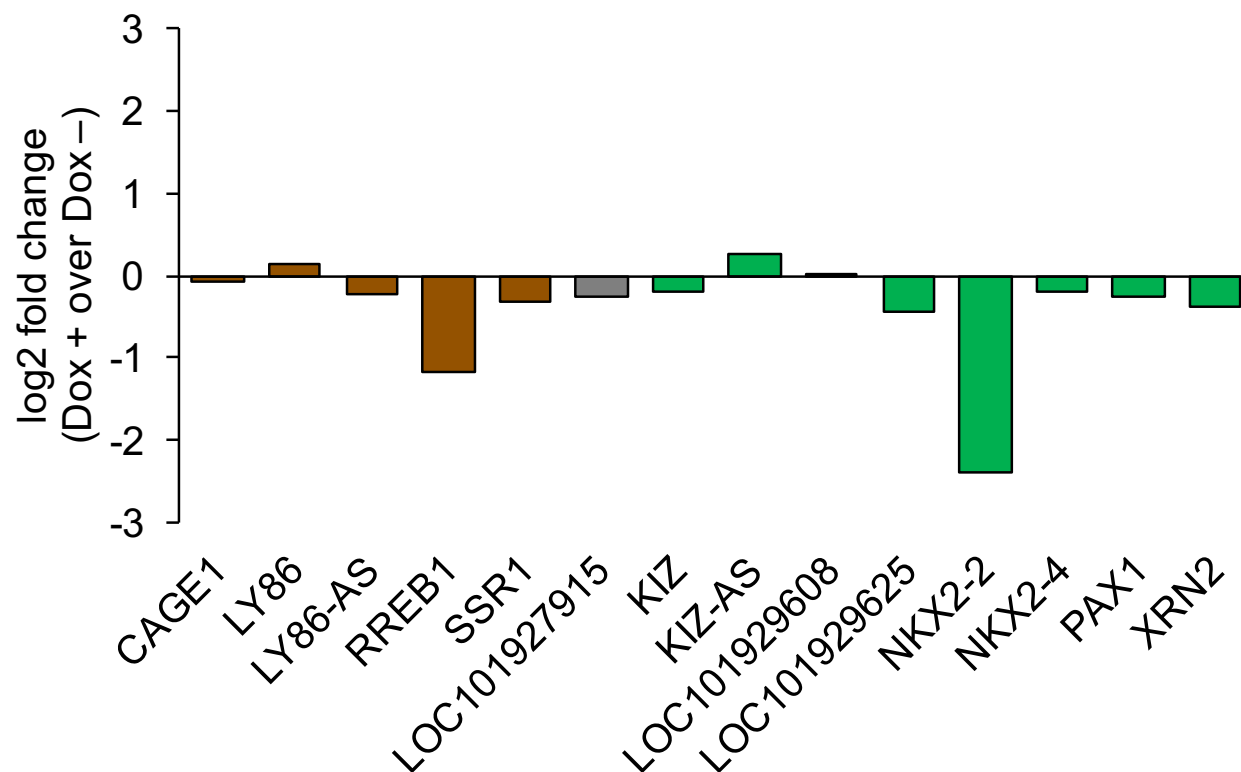

**Supplementary Figure 10.** Integrative view of lead SNP at 20p11.22 (rs6047482) and highly correlated CEU variants from LDlink, RefSeq genes, GGAA nucleotide repeat sequences, H3K27ac markers of open chromatin and FLI1 ChIP-seq for *EWSR1-FLI1* fusion binding in EWS cell lines A673 and TC71. A673 siEF1, A673 with siRNA-mediated knock down of *EWSR1-FLI1*.

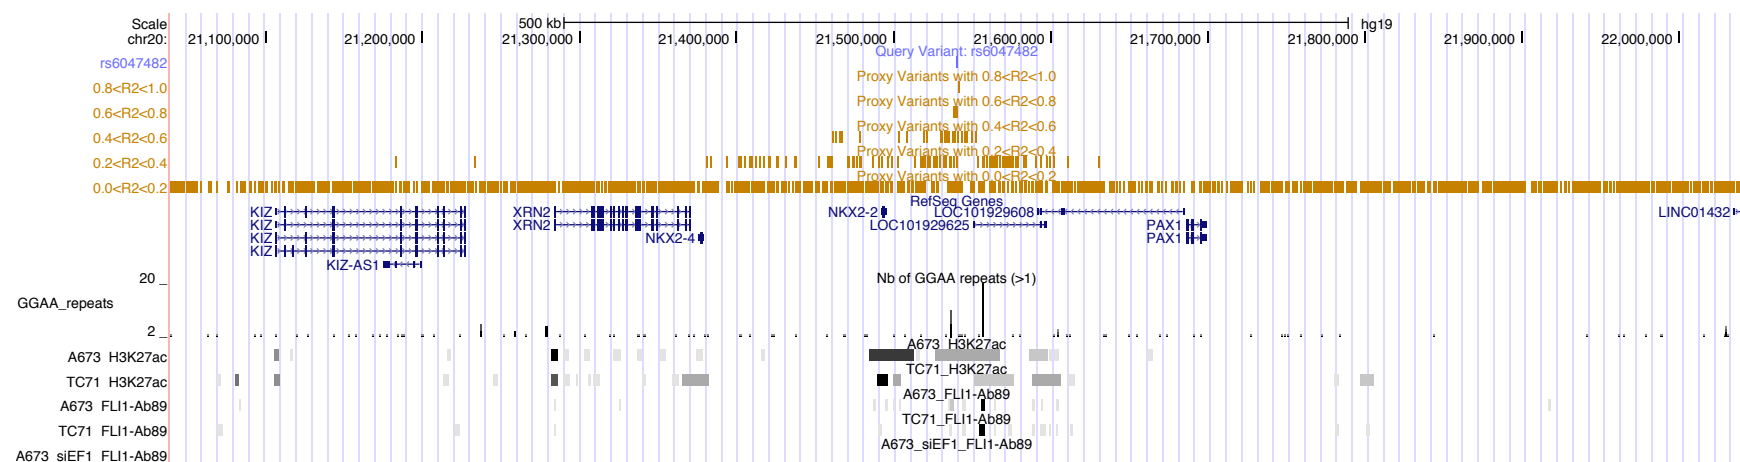

**Supplementary Figure 11.** Integrative view of lead SNP at 20p11.23 (rs67425864) and highly correlated CEU variants from LDlink, RefSeq genes, GGAA nucleotide repeat sequences, H3K27ac markers of open chromatin and FLI1 ChIP-seq for *EWSR1-FLI1* fusion binding in EWS cell lines A673 and TC71. A673 siEF1, A673 with siRNA-mediated knock down of *EWSR1-FLI1*.

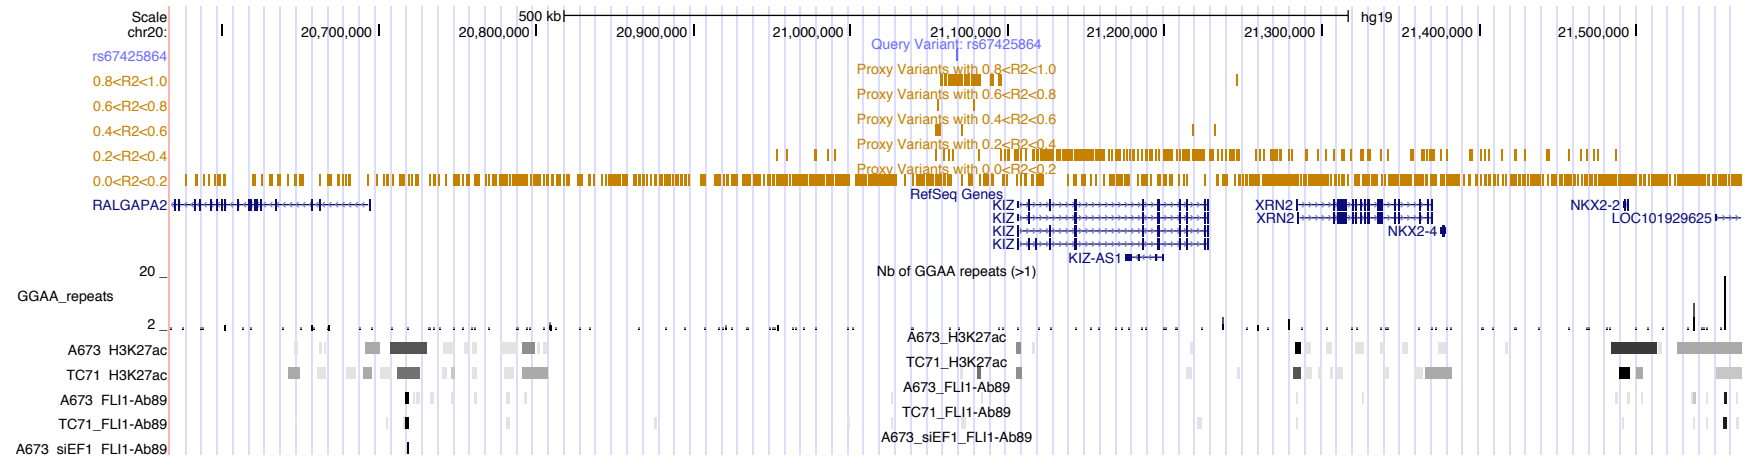

**Supplementary Figure 12.** EWS genetic risk score (GRS) combining genotype data for the 6 EWS susceptibility loci. **(A)** The distribution comparing cancer-free adult controls (blue) to EWS cases (red). On average, EWS cases carry 1.08 more risk alleles at EWS susceptibility loci than controls (7.08 average risk alleles in EWS cases, 6.01 average risk alleles in controls;  $P\text{-value}=2.44\times 10^{-63}$ ). **(B)** Area under the receiver operating characteristic curve ( $\text{AUC}=0.7149$ ) comparing the EWS GRS in cases and controls.

**A**

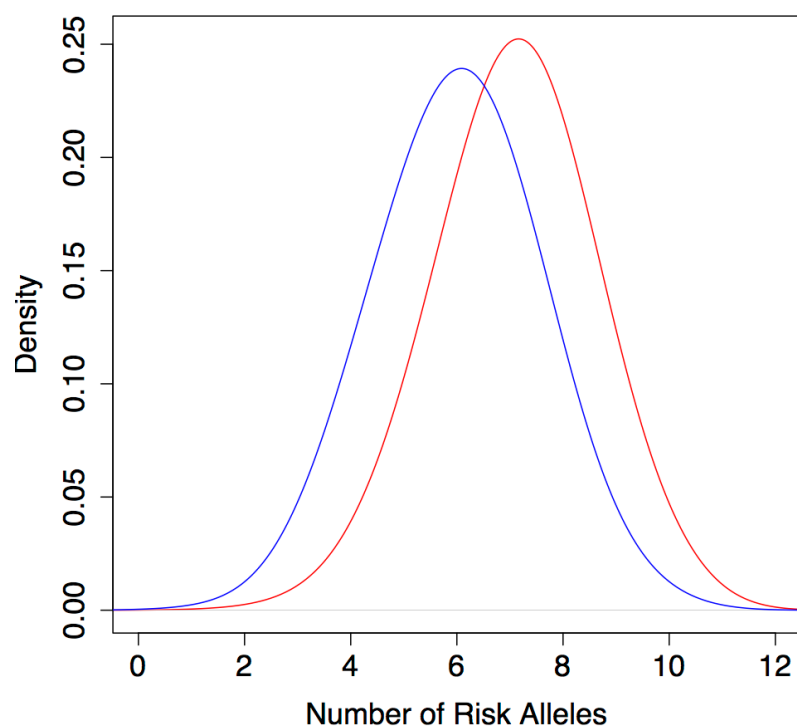

**B**

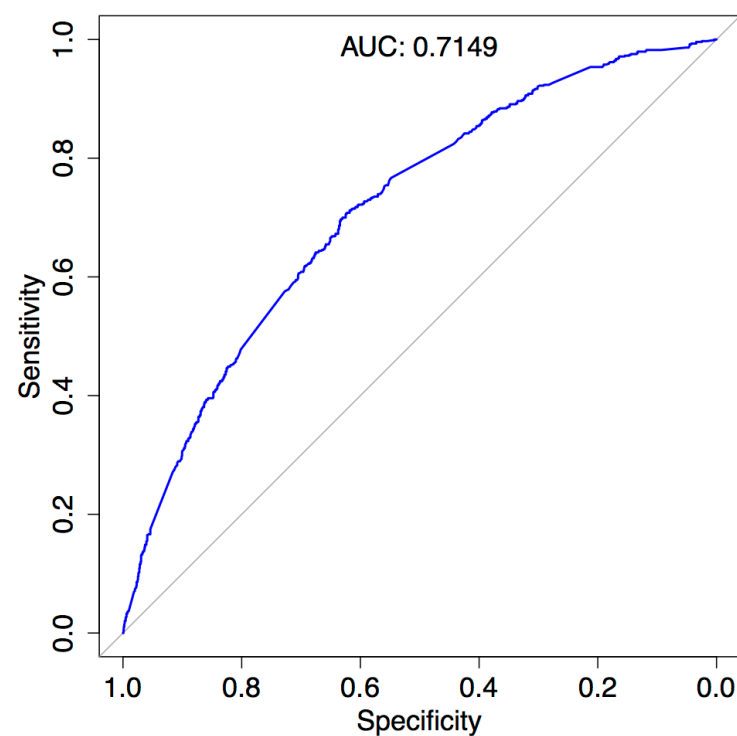



**Supplementary Figure 13.** Plots of the first 2 principal components showing the matching of cases (red) and controls (blue) across the 3 analytical sets: (A) published set, (B) NCI/Curie set and (C) CCSS set.

**A**

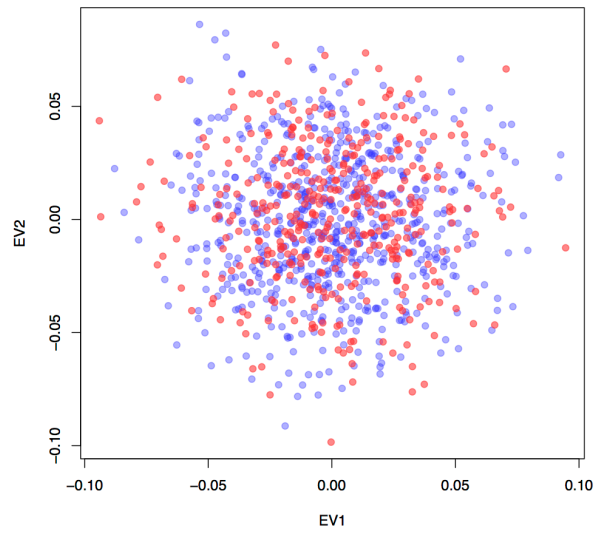

**B**

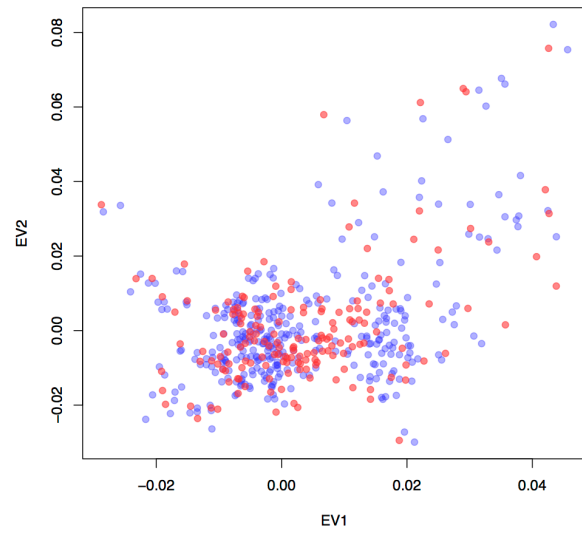

**C**

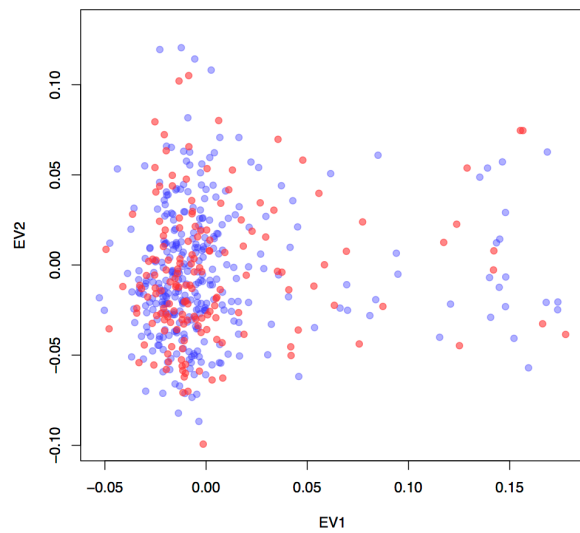

Supplement: MOESM1 [file 41467_2018_5537_MOESM1_ESM.pdf › 41467_2018_5537_MOESM1_ESM.pdf]
